# Supplementary material for: Synthesis and Characterization of New Triazole-Bispidinone Scaffolds and Their Metal Complexes for Catalytic Applications
Source: MDPI journal article supplement (doi:10.3390/molecules28176351), 2023-08-30
Supplement: s1 [file s1]

# Supplementary Materials

## Synthesis and characterization of new triazole-bispidinone scaffolds and their metal complexes for catalytic applications

Arianna Rossetti,<sup>1,2,\*</sup> Alessandro Sacchetti,<sup>1,2</sup> Fiorella Meneghetti,<sup>3,\*</sup> Greta Colombo Dugoni,<sup>1</sup> Matteo Mori,<sup>3</sup> Carlo Castellano<sup>4</sup>

<sup>1</sup> Department of Chemistry, Materials and Chemical Engineering “G. Natta”, Politecnico di Milano, via Mancinelli 7, 20131 Milano, Italy

<sup>2</sup> INSTM - Local Unit c/o Politecnico di Milano, via Mancinelli 7, 20131 Milano, Italy

<sup>3</sup> Department of Pharmaceutical Sciences, University of Milan, via L. Mangiagalli 25, 20133 Milano, Italy

<sup>4</sup> Department of Chemistry, University of Milan, via C. Golgi 19, 20133 Milano, Italy

\* Correspondence: [arianna.rossetti@polimi.it](mailto:arianna.rossetti@polimi.it); [fiorella.meneghetti@unimi.it](mailto:fiorella.meneghetti@unimi.it)

## **Table of Contents**

|                                                          |                 |
|----------------------------------------------------------|-----------------|
| <b>1. NMR DATA</b>                                       | <b>Pag. S3</b>  |
| <b>2. NMR TITRATION OF BISPIDINE-METAL<br/>COMPLEXES</b> | <b>Pag. S41</b> |
| <b>3. ESI-MS ANALYSES</b>                                | <b>Pag. S44</b> |

# 1. NMR DATA

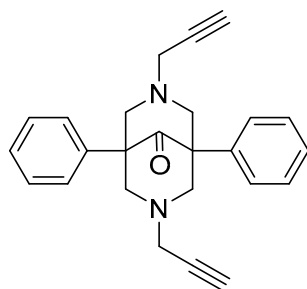

**1**

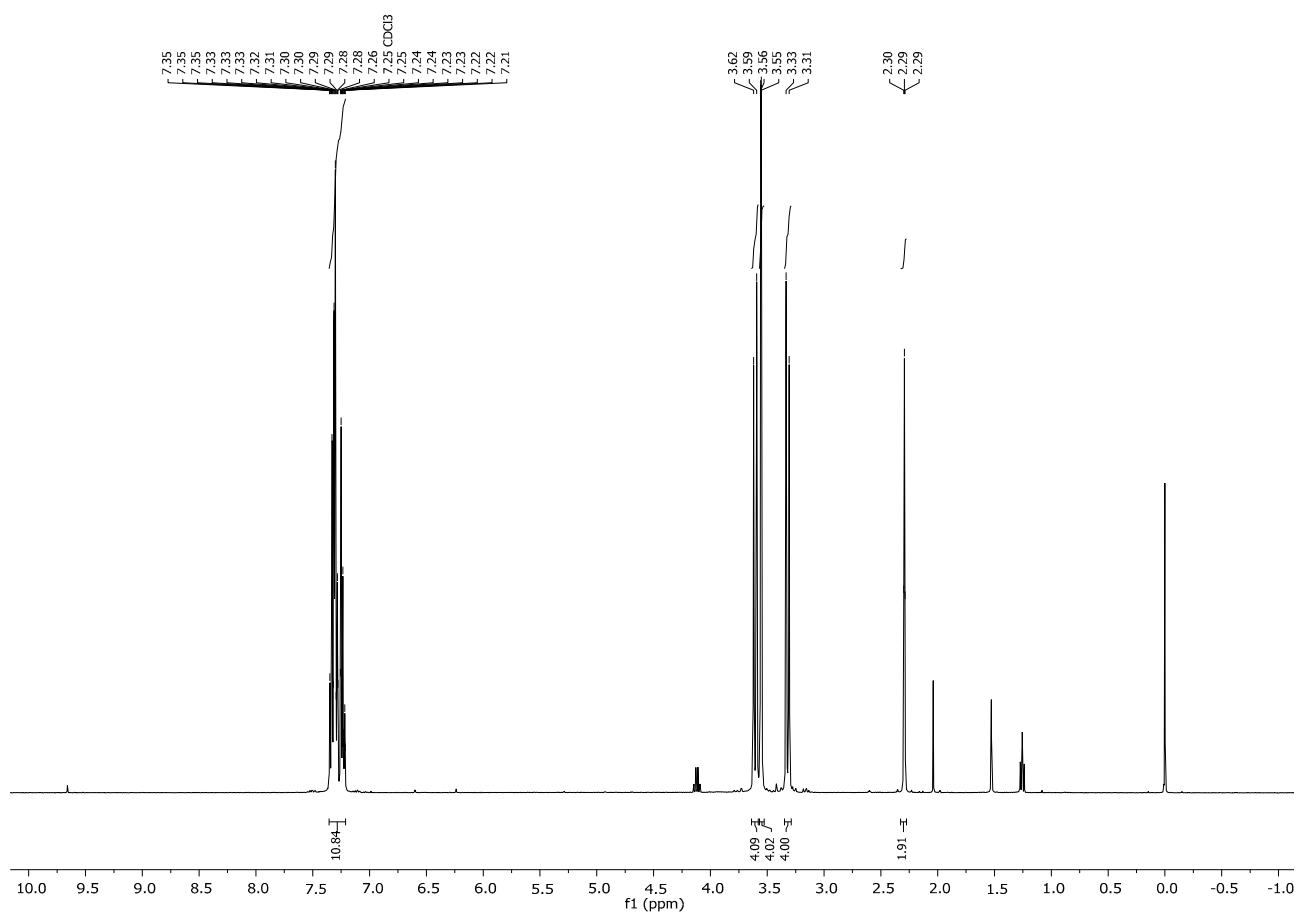

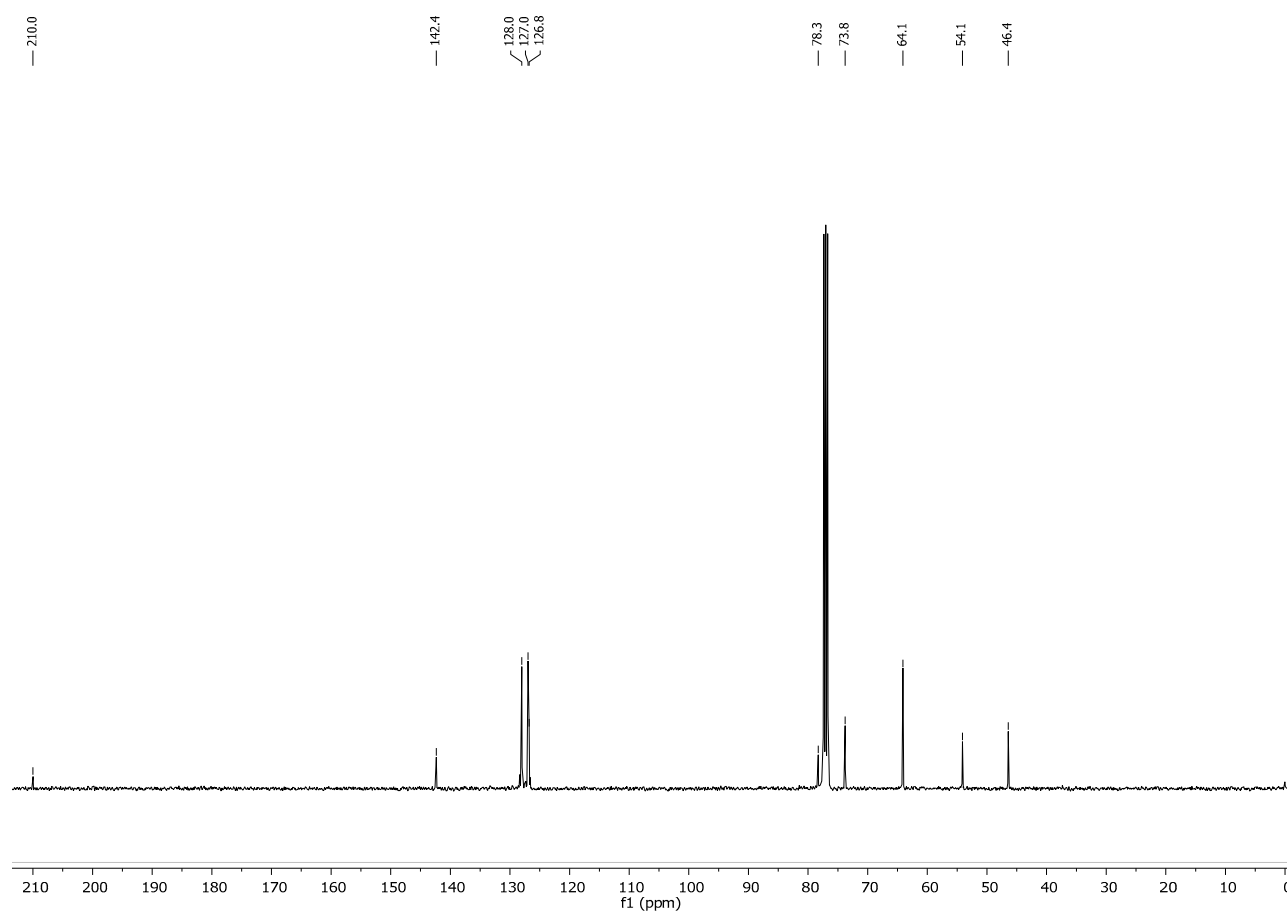

**Figure S1.**  $^1\text{H}$  and  $^{13}\text{C}$ -NMR spectra of compound **1**.

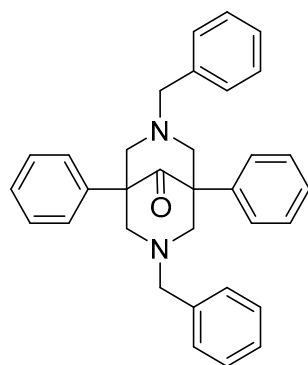

**2**

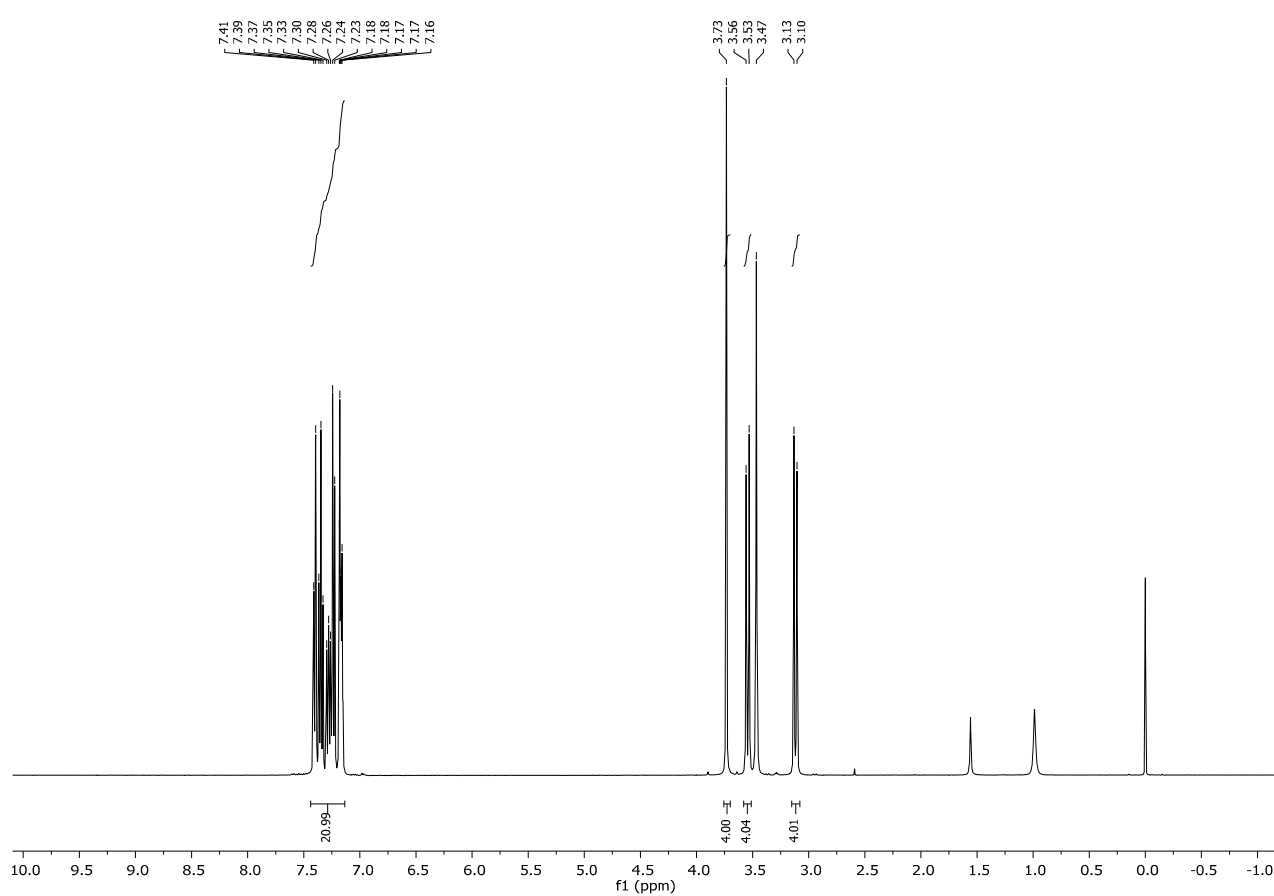

**Figure S2.**  $^1\text{H}$ -NMR spectrum of compound **2** in accordance with literature. [Black, D.S.C.; Deacon, G.B.; Rose, M. Synthesis and metal complexes of symmetrically N-substituted bispidinones. *Tetrahedron* **1995**, *51*, 2055–2076, doi:10.1016/0040-4020(94)01069-C.]

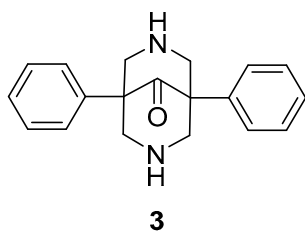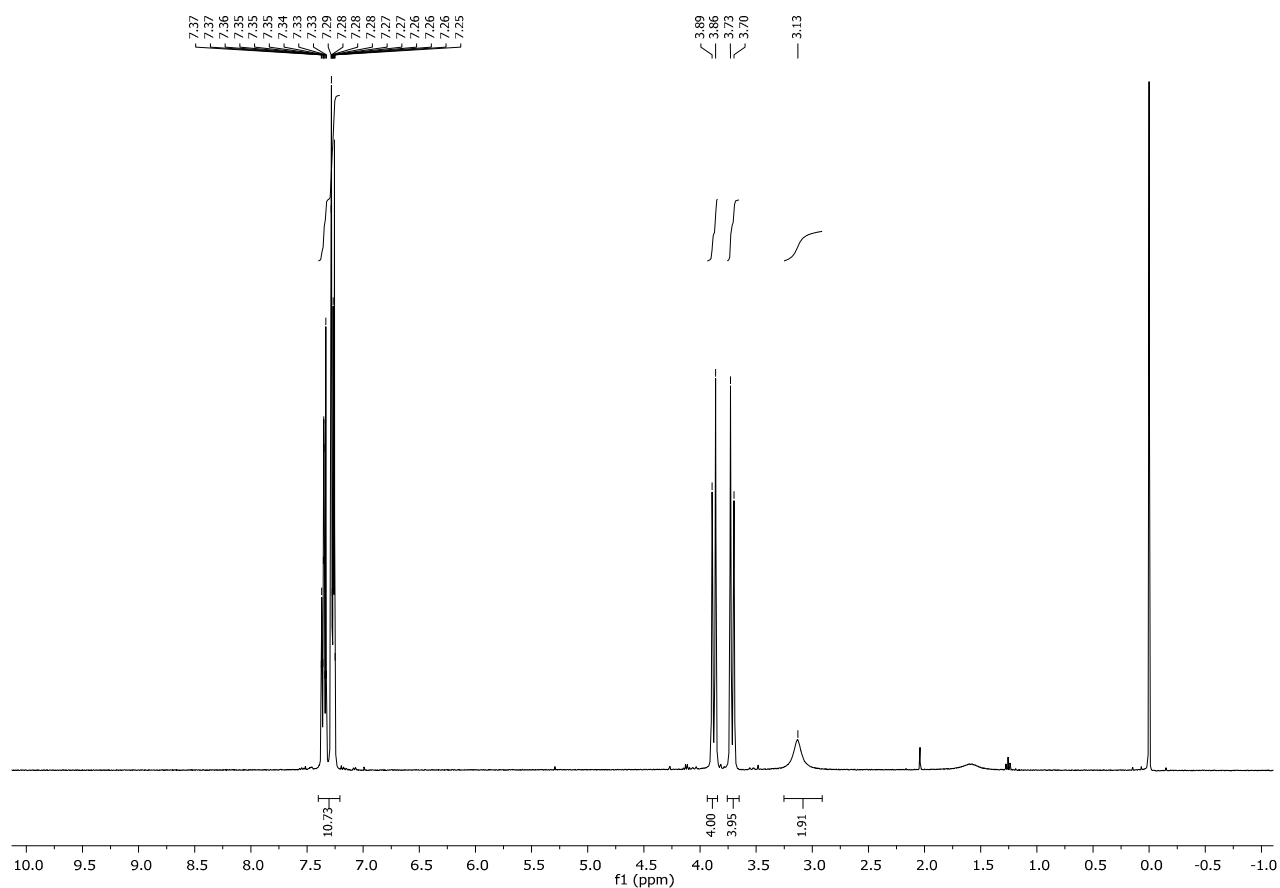

**Figure S3.**  $^1\text{H}$ -NMR spectrum of compound **3** in accordance with literature. [Black, D.S.C.; Deacon, G.B.; Rose, M. Synthesis and metal complexes of symmetrically N-substituted bispidinones. *Tetrahedron* **1995**, 51, 2055–2076, doi:10.1016/0040-4020(94)01069-C.]

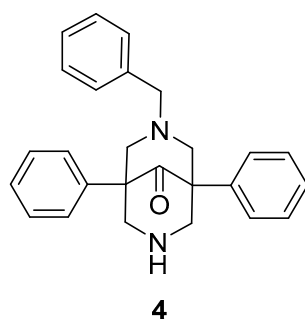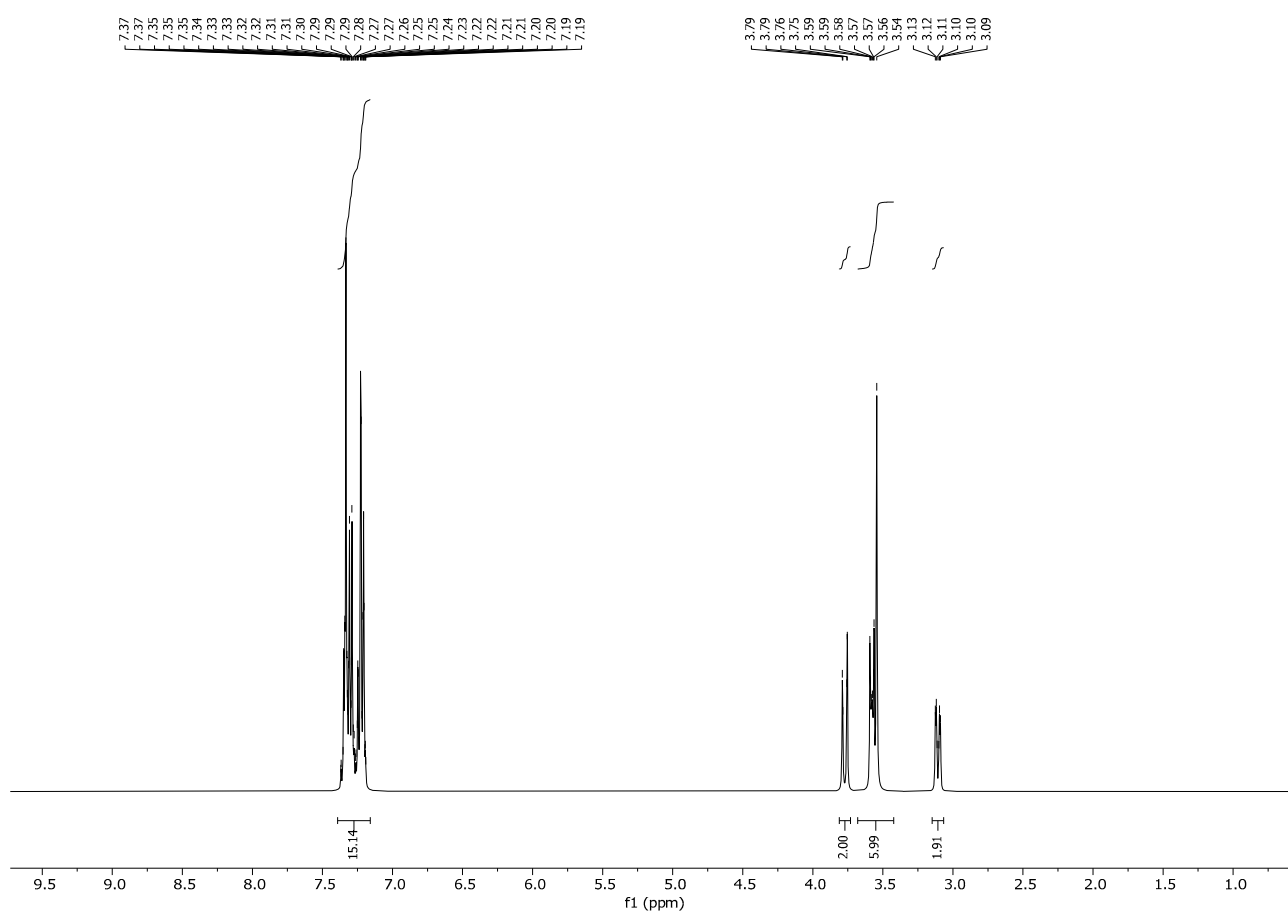

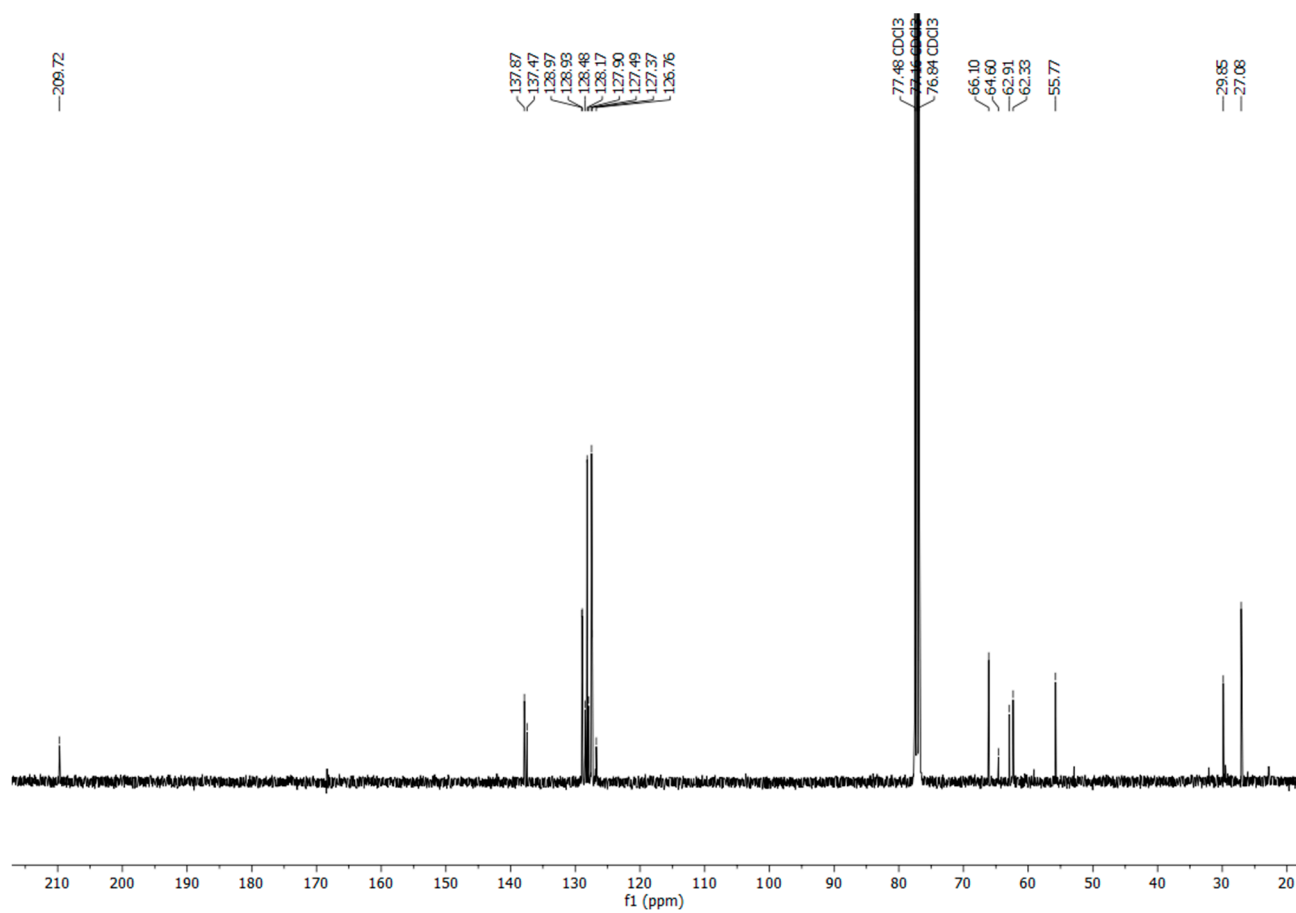

Figure S4.  $^1\text{H}$  and  $^{13}\text{C}$ -NMR spectra of compound 4.



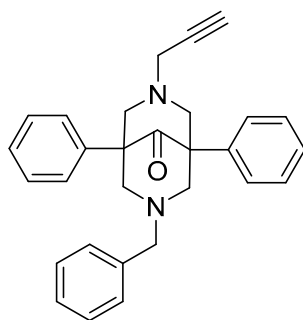

5

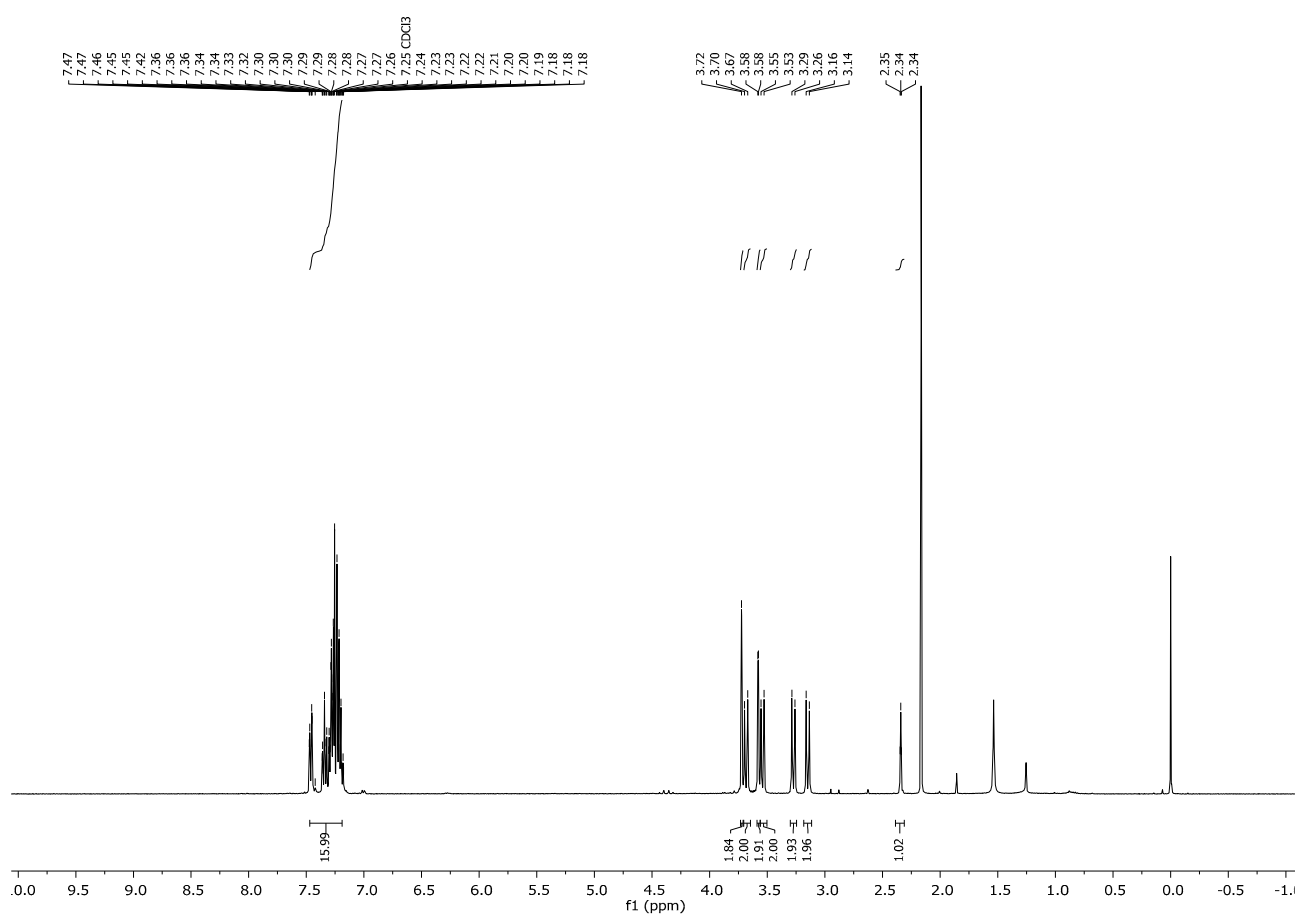

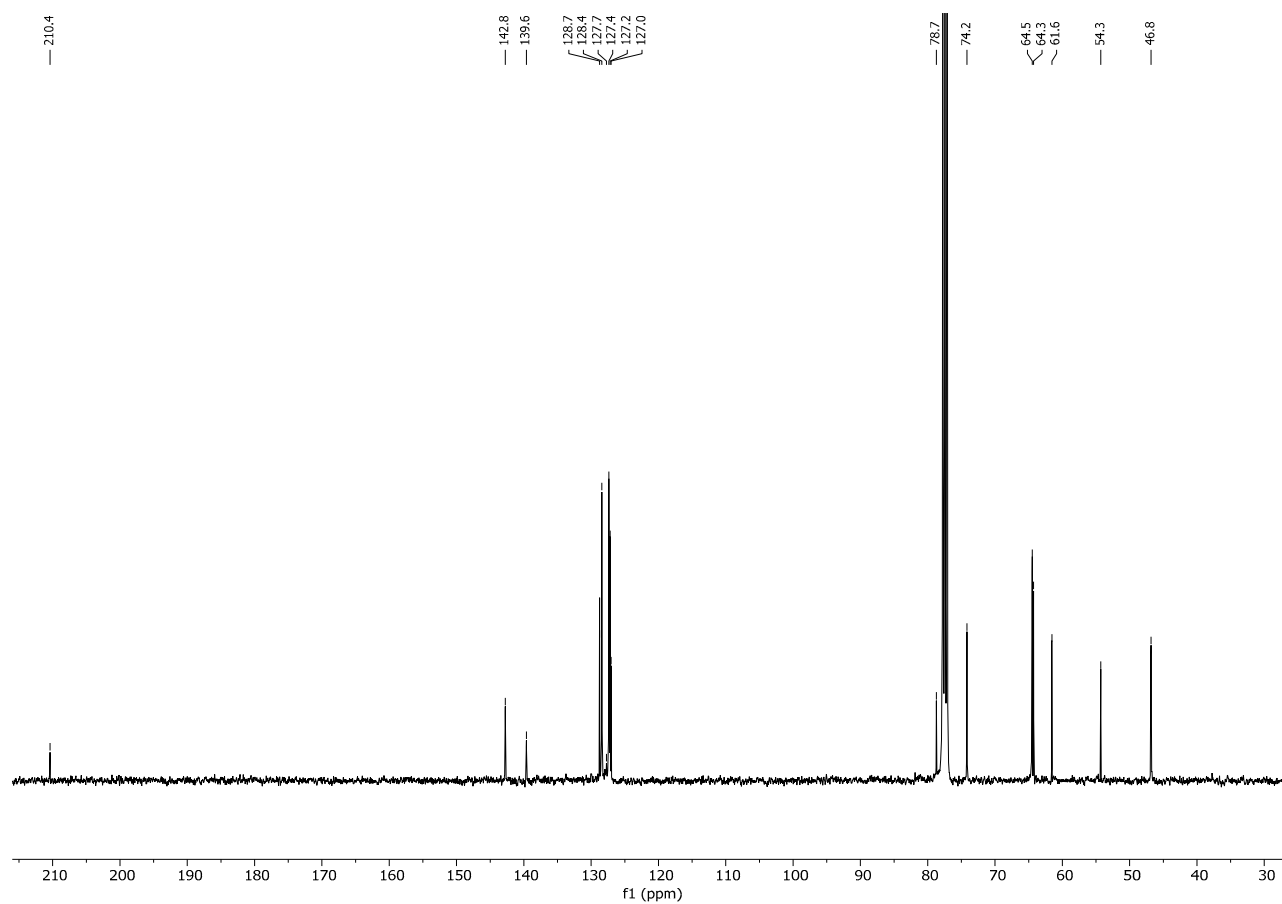

**Figure S5.**  $^1\text{H}$  and  $^{13}\text{C}$ -NMR spectra of compound **5**.

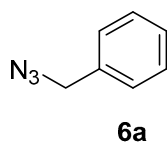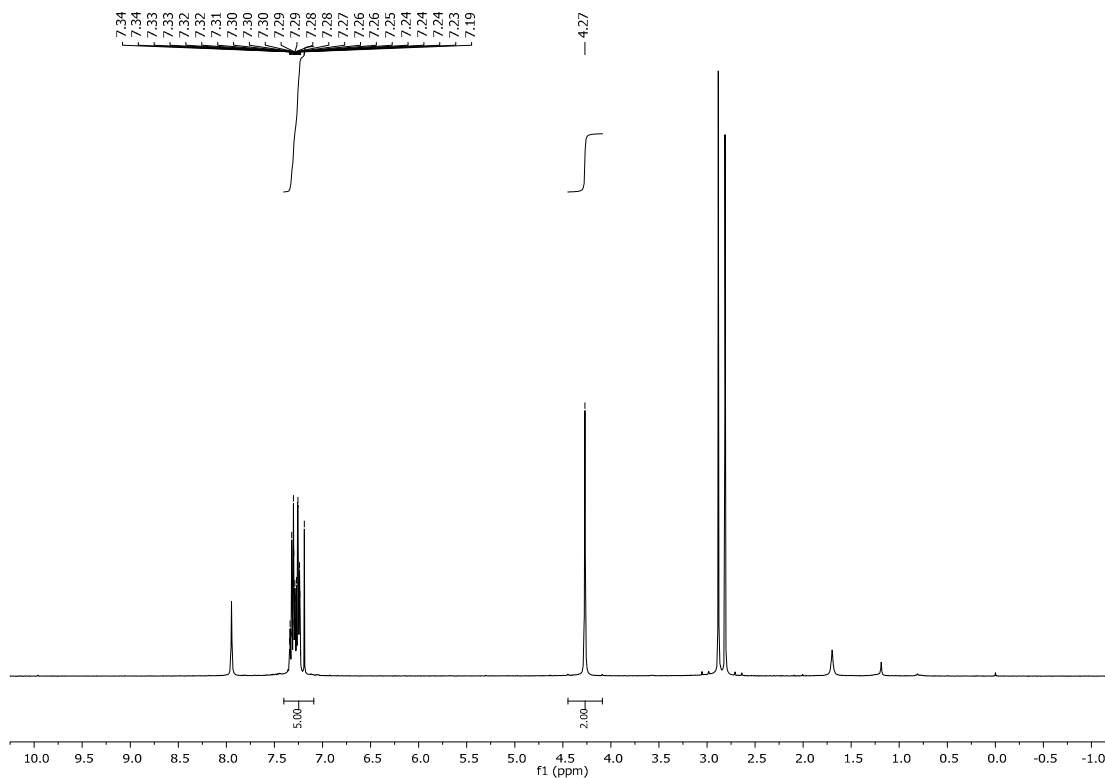

**Figure S6.** <sup>1</sup>H-NMR spectrum of compound **6a** in accordance with literature. [Zhong, Z.; Chesti, J.; Armstrong, A.; Bull, J.A. Synthesis of Sulfoximine Propargyl Carbamates under Improved Conditions for Rhodium Catalyzed Carbamate Transfer to Sulfoxides *J. Org. Chem.* **2022** *87*, 16115-16126; doi: 10.1021/acs.joc.2c02083B.]

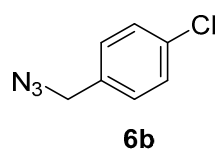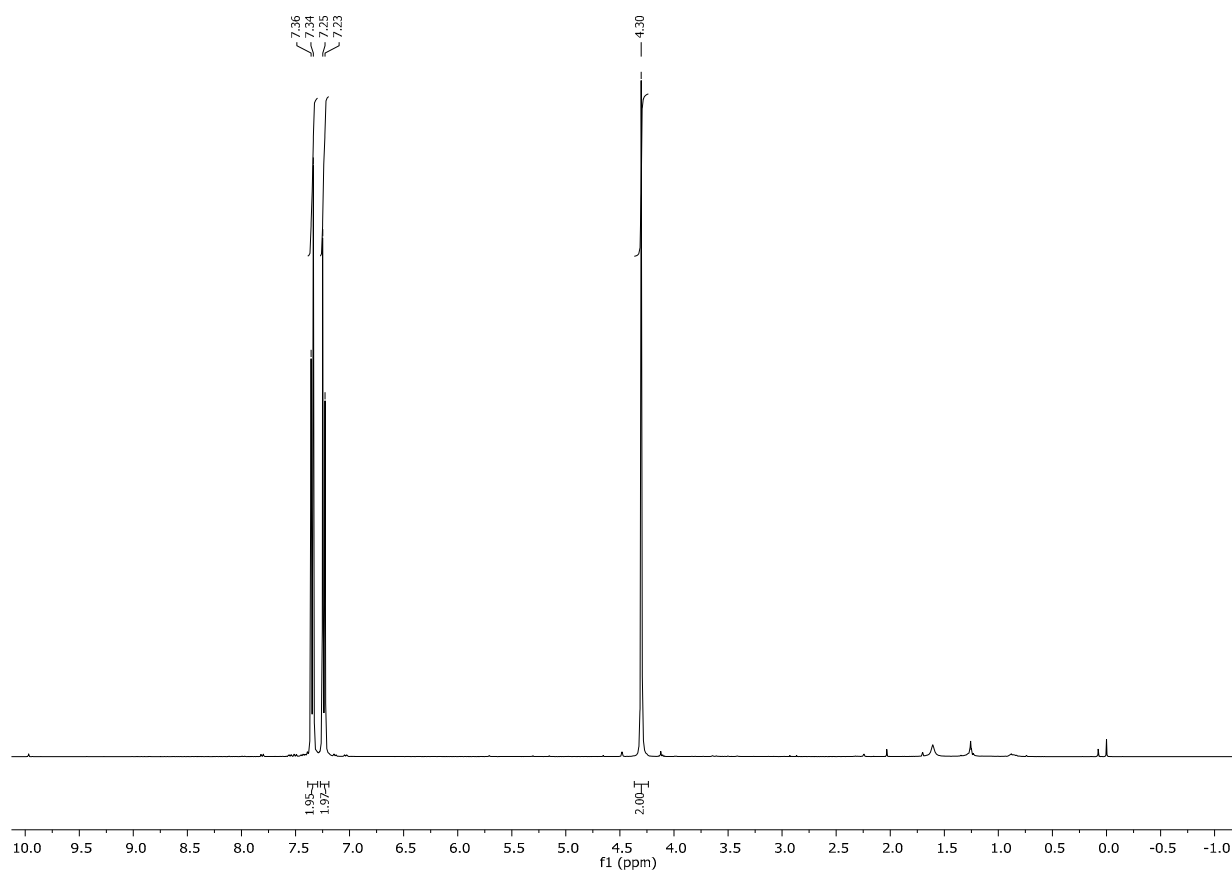

**Figure S7.** <sup>1</sup>H-NMR spectrum of compound **6b** in accordance with literature. [Vairoletti, F.; Paulino, M.; Mahler, G.; Salinas, G.; Saiz, C. Structure-Based Bioisosterism Design, Synthesis, Biological Evaluation and In Silico Studies of Benzamide Analogs as Potential Anthelmintics. *Molecules* **2022**, *27*, 2659; doi: 10.3390/molecules27092659.]

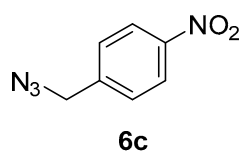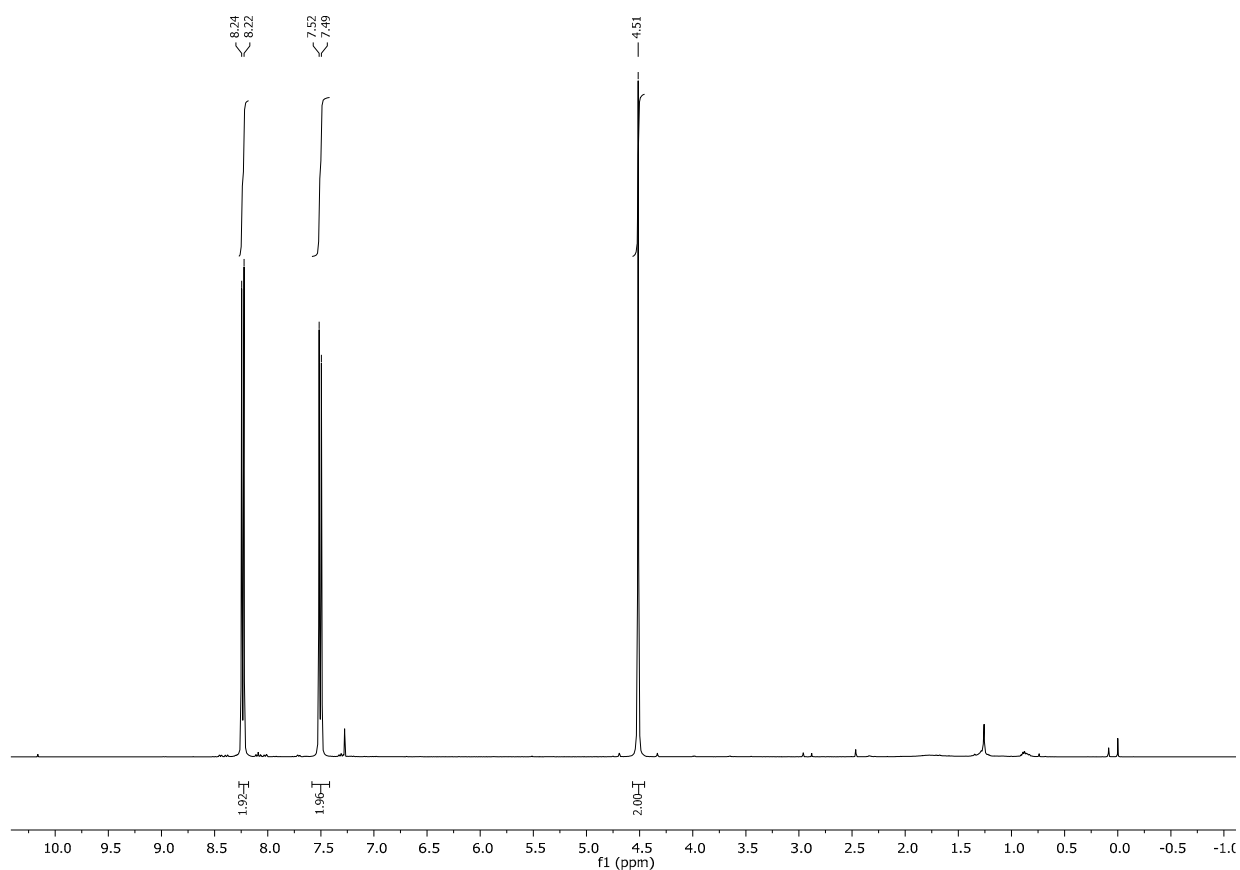

**Figure S8.**  $^1\text{H}$ -NMR spectrum of compound **6c** in accordance with literature. [Rabet, P.T.G.; Fumagalli, G.; Boyd, S.; Greaney, M.F. Benzylic C–H Azidation Using the Zhdankin Reagent and a Copper Photoredox Catalyst, *Org. Lett.* **2016** *18*, 1646-1649; doi: 10.1021/acs.orglett.6b00512.]

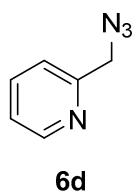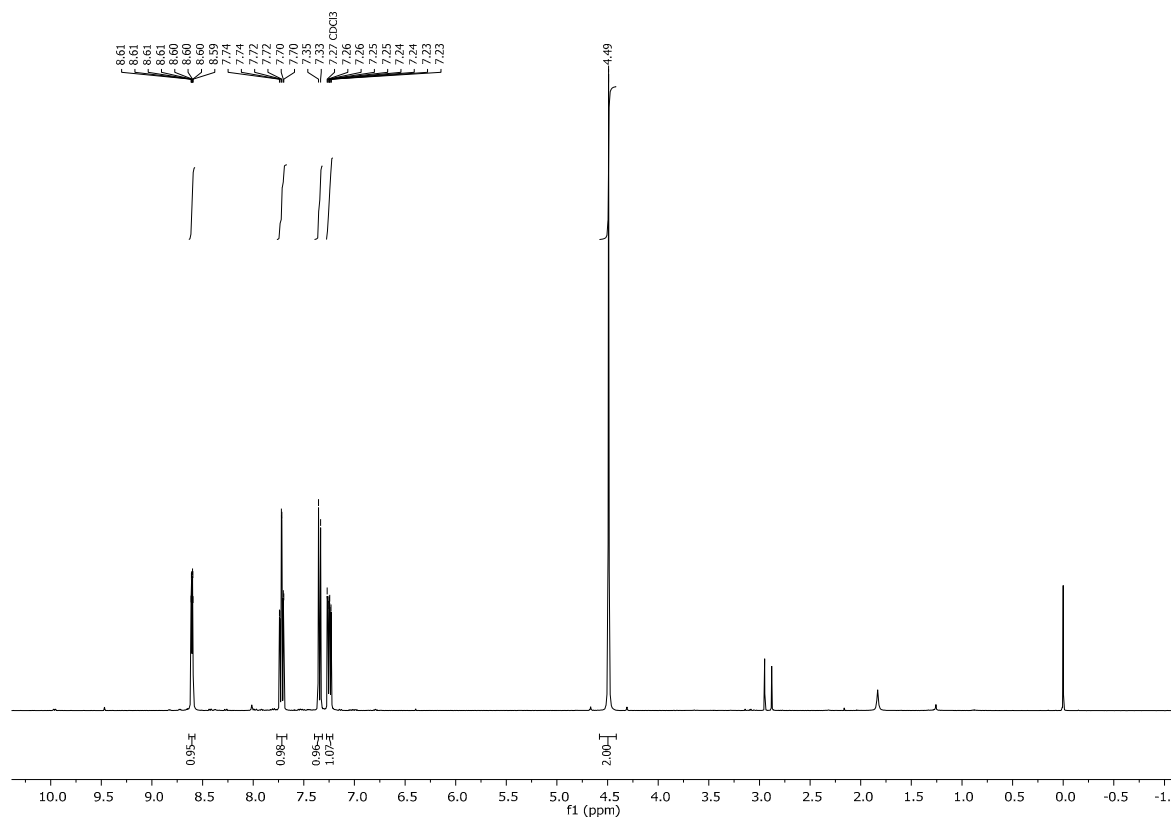

**Figure S9.**  $^1\text{H}$ -NMR spectrum of compound **6d** in accordance with literature. [Sacchetti, A.; Urra-Mancilla, C.; Colombo Dugoni, G. Synthesis of DPA-triazole structures and their application as ligand for metal catalyzed organic reactions, *Tetrahedron*, **2022**, 132581; doi: 10.1016/j.tet.2021.132581.]

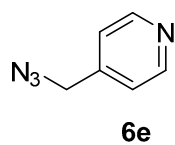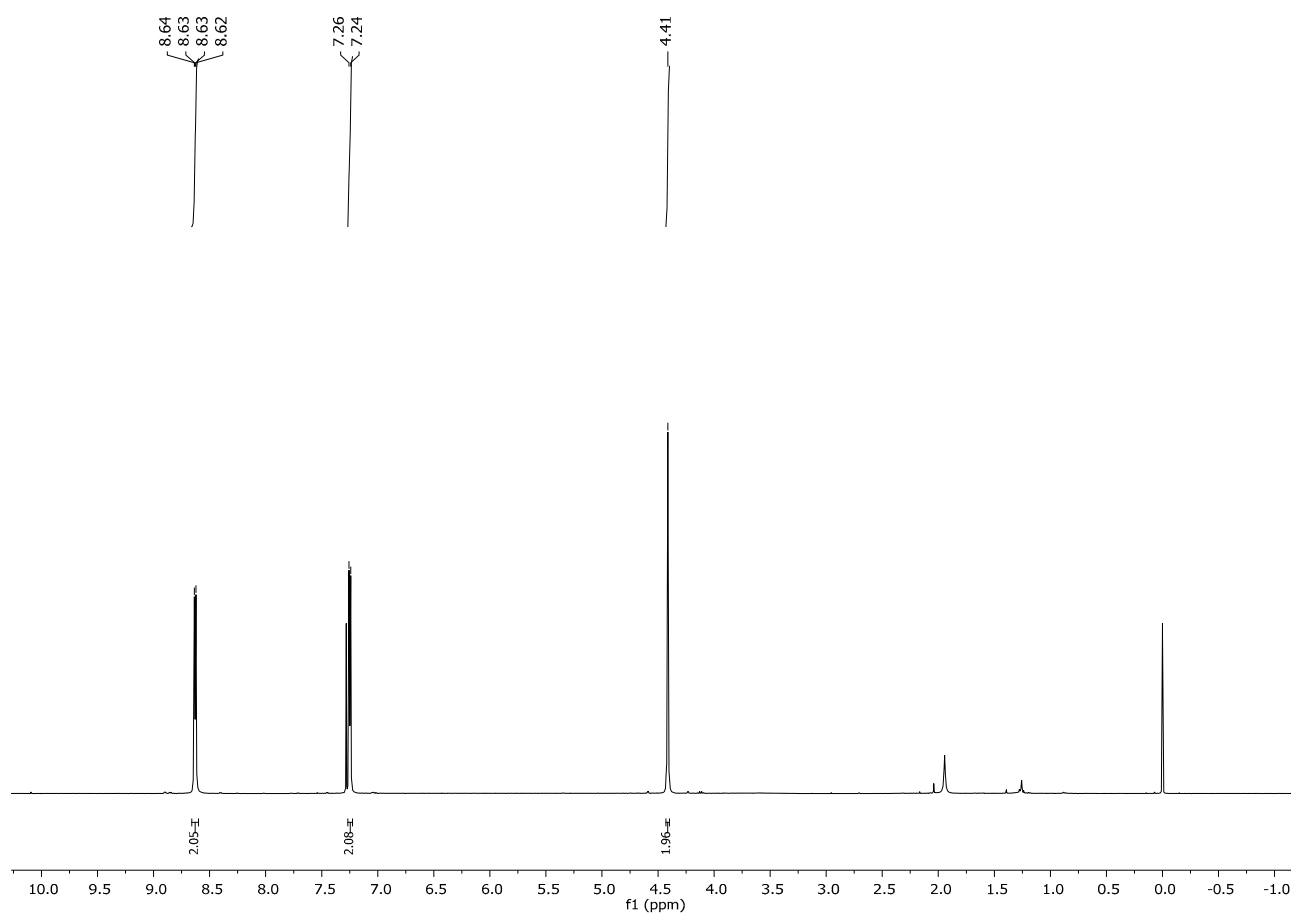

**Figure S10.**  $^1\text{H}$ -NMR spectrum of compound **6e** in accordance with literature. [Sacchetti, A.; Urra-Mancilla, C.; Colombo Dugoni, G. Synthesis of DPA-triazole structures and their application as ligand for metal catalyzed organic reactions, *Tetrahedron*, **2022**, 132581; doi: 10.1016/j.tet.2021.132581.]

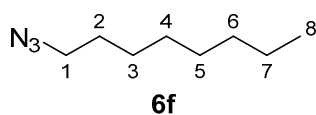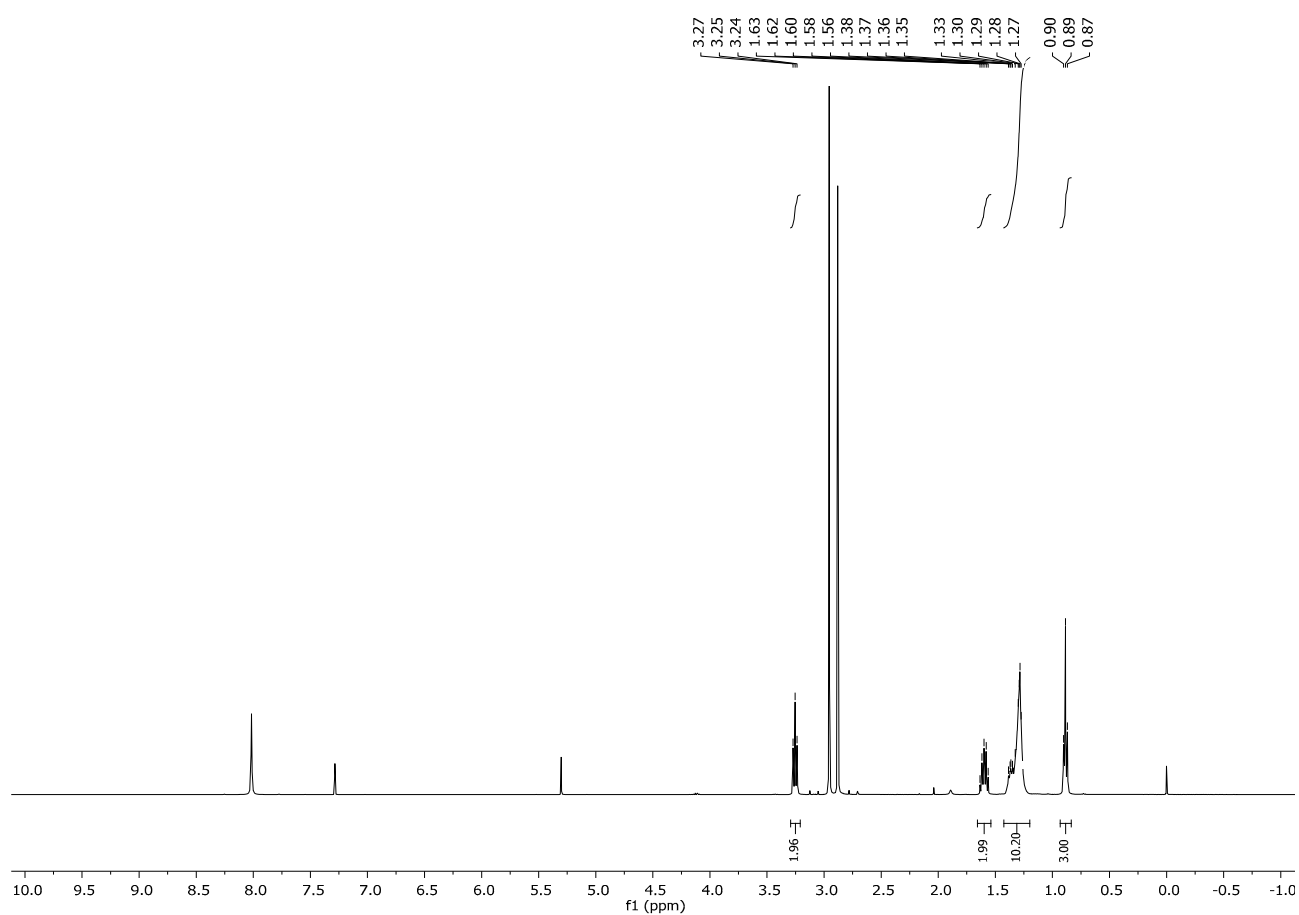

**Figure S11.**  $^1\text{H}$ -NMR spectrum of compound **6f** in accordance with literature. [Proietti, G.; Prathap, K.J.; Ye, X.; Olsson, R.T.; Dinér, P. Nickel Boride Catalyzed Reductions of Nitro Compounds and Azides: Nanocellulose-Supported Catalysts in Tandem Reactions. *Synthesis* **2022**; 54, 133-146; doi: 10.1055/a-1579-2190.]



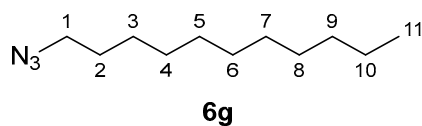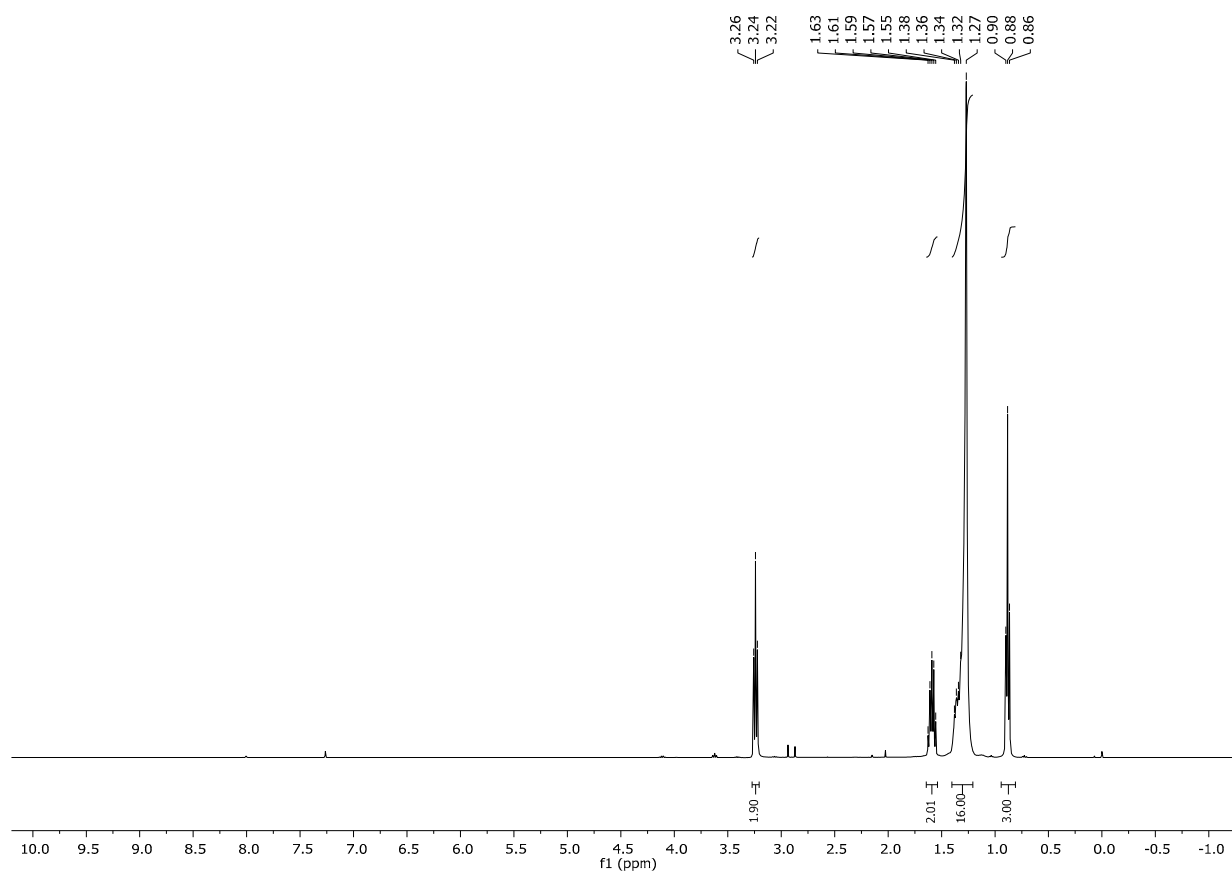

**Figure S12.**  $^1\text{H}$ -NMR spectrum of compound **6g** in accordance with literature. [Natarajan, B.; Jayaraman, N. Synthesis and studies of Rh(I) catalysts within and across poly(alkyl aryl ether) dendrimers, *J. Organometallic Chem.*, 696, **2011**, 722-730; doi: 10.1016/j.jorganchem.2010.09.054.]

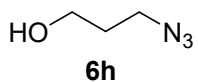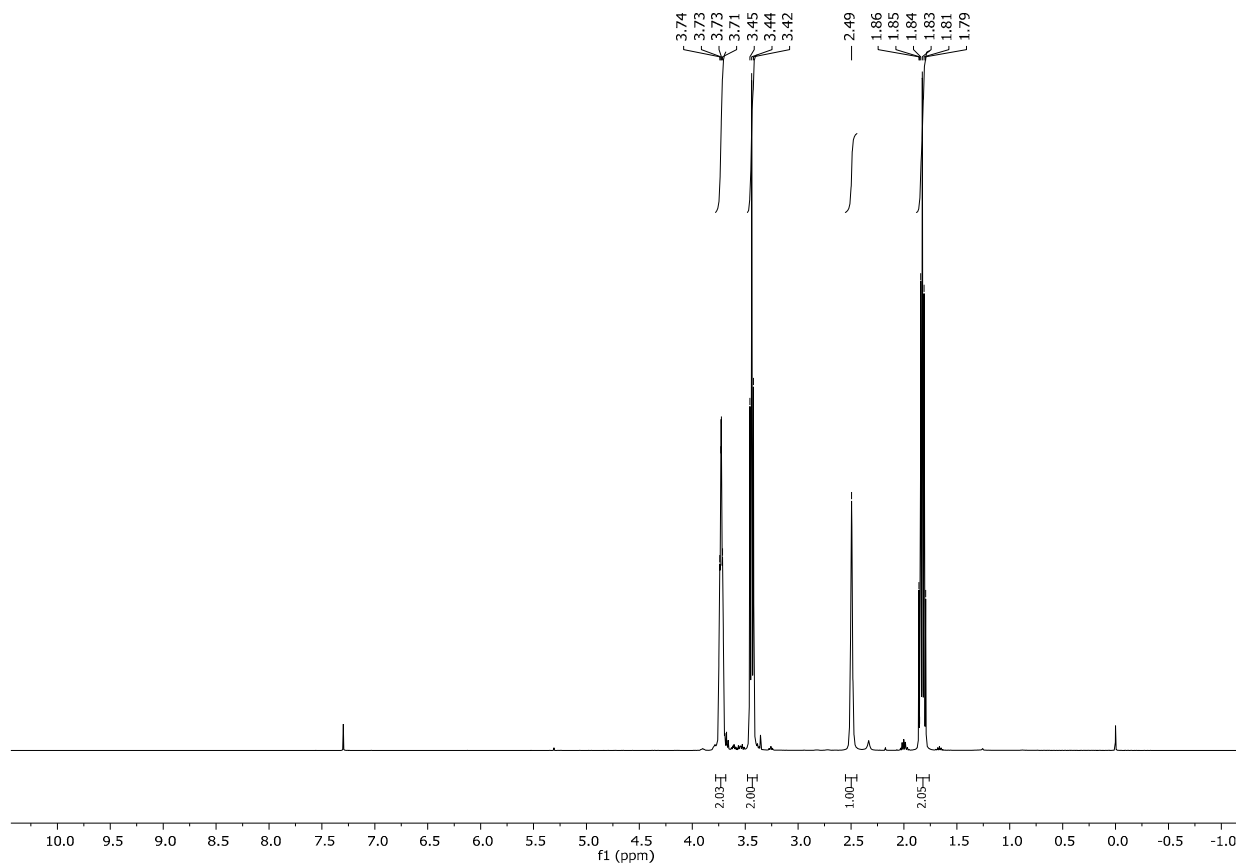

**Figure S13.** <sup>1</sup>H-NMR spectrum of compound **6h** in accordance with literature. [Macerata, E.; Mossini, E.; Scaravaggi, S.; Mariani, M.; Mele, A.; Panzeri, W.; Boubals, N.; Berthon, L.; Charbonnel, M-C.; Sansone, F.; Arduini, A.; Casnati, A. Hydrophilic Clicked 2,6-Bis-triazolyl-pyridines Endowed with High Actinide Selectivity and Radiochemical Stability: Toward a Closed Nuclear Fuel Cycle *J. Am. Chem. Soc.* **2016** 138 (23), 7232-7235; doi: 10.1021/jacs.6b03106.]

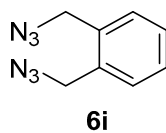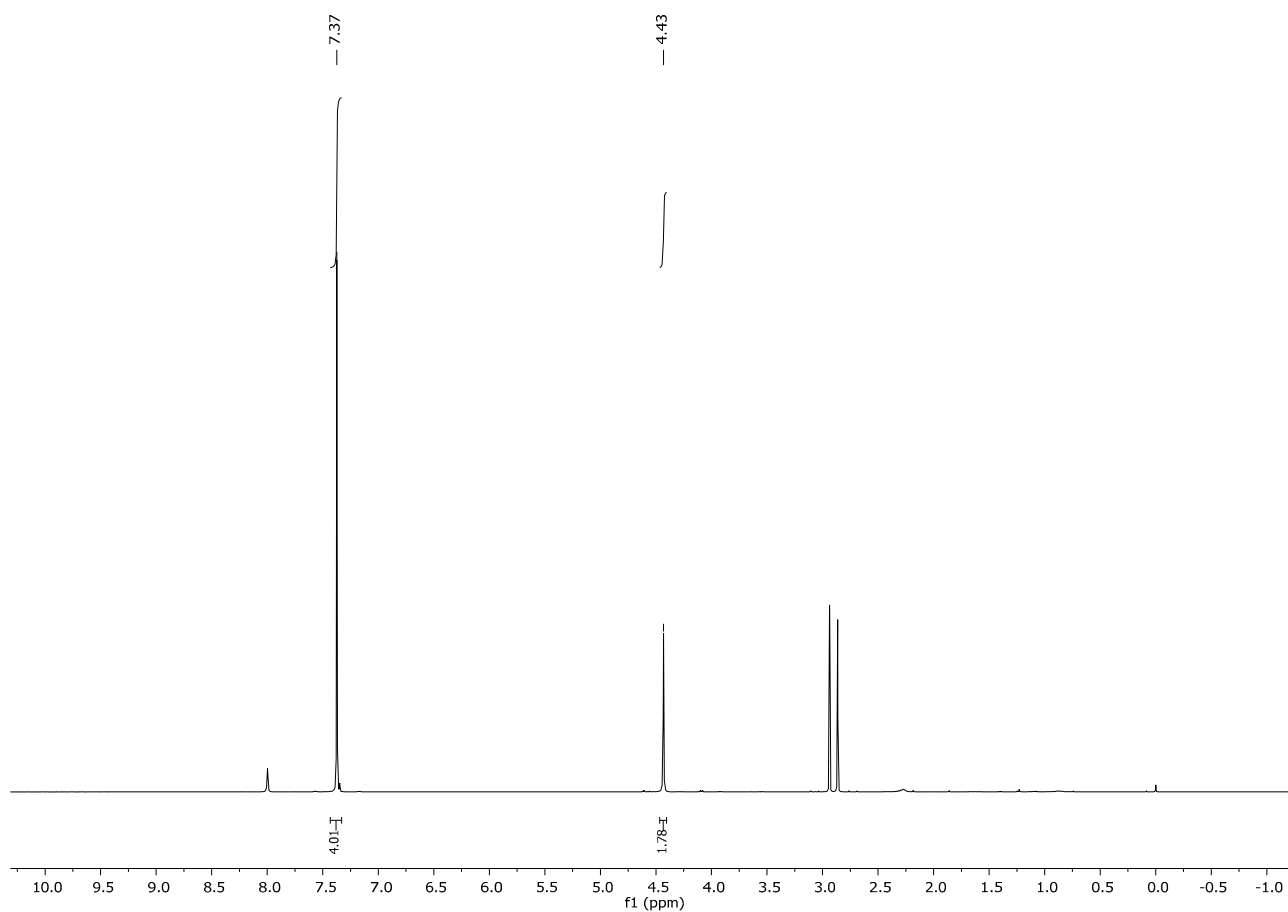

**Figure S14.**  $^1\text{H}$ -NMR spectrum of compound **6i** in accordance with literature. [Guo, Z.-F.; Yan, H.; Li, Z.-F.; Lu, Z.-L. Synthesis of mono- and di-[12]aneN<sub>3</sub> ligands and study on the catalytic cleavage of RNA model 2-hydroxypropyl-p-nitrophenyl phosphate with their metal complexes, *Org. Biomol. Chem.*, **2011**, 9, 6788-6796; doi: 10.1039/C1OB05942D.]

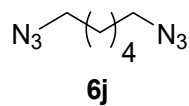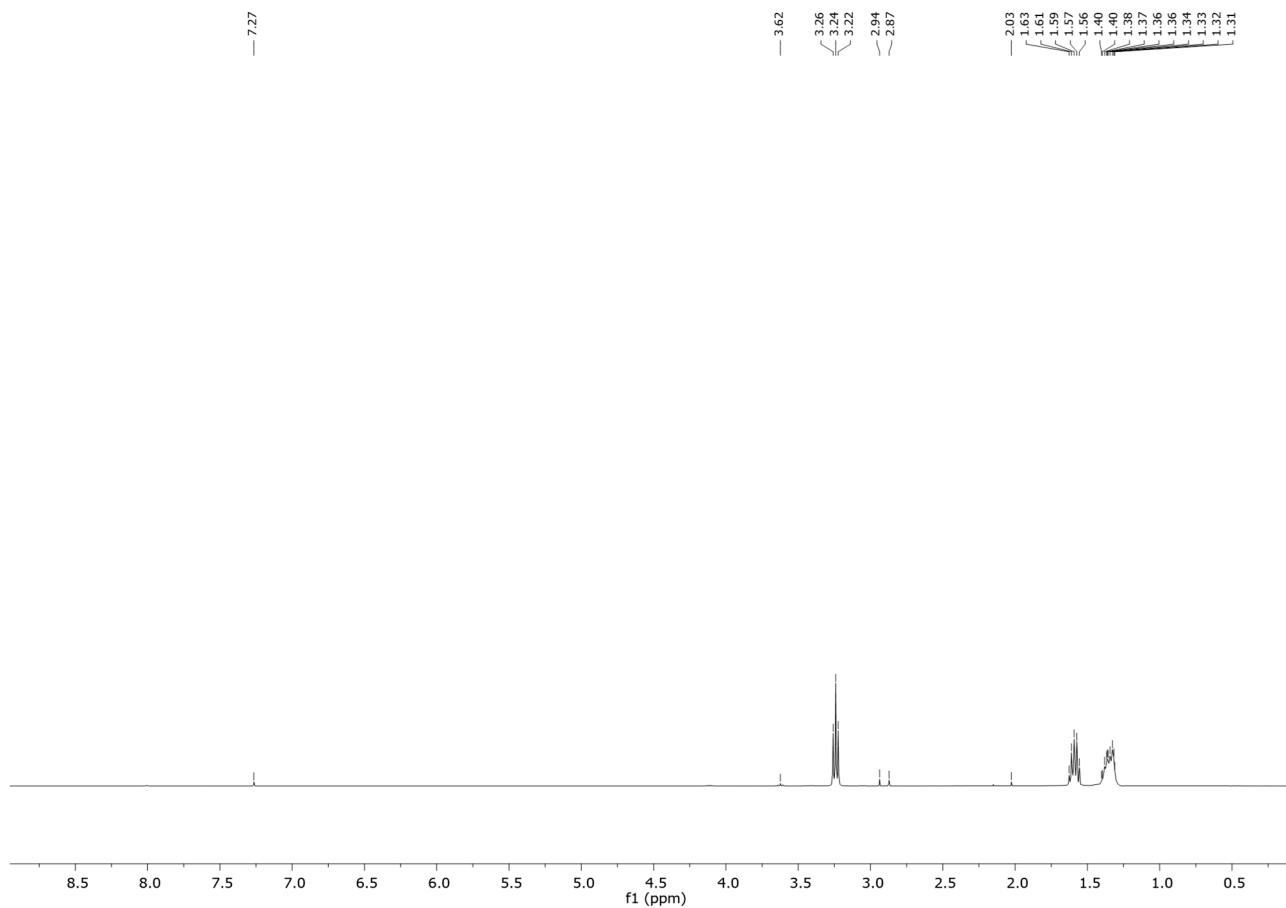

**Figure S15.**  $^1\text{H}$ -NMR spectrum of compound **6j** in accordance with literature. [Peng, L.; Zhao, Y.; Okuda, Y.; Le, L.; Tang, Z.; Yin, S.-F.; Qiu, R.; Orita, A. Process-Divergent Syntheses of 4- and 5-Sulfur-Functionalized 1,2,3-Triazoles via Copper-Catalyzed Azide–Alkyne Cycloadditions of 1-Phosphinyl-2-sulfanylethynes *The Journal of Organic Chemistry* **2023** 88 (5), 3089-3108; doi: 10.1021/acs.joc.2c02876.]

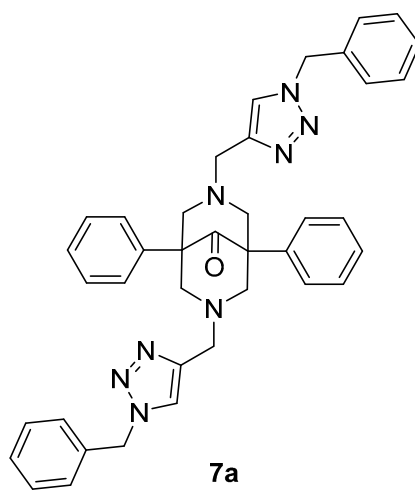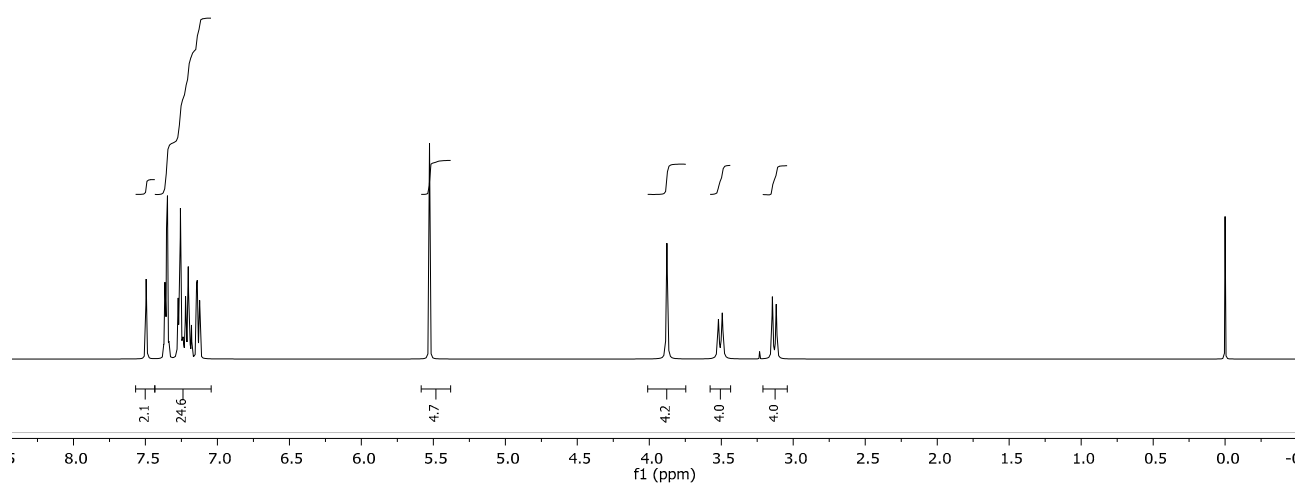

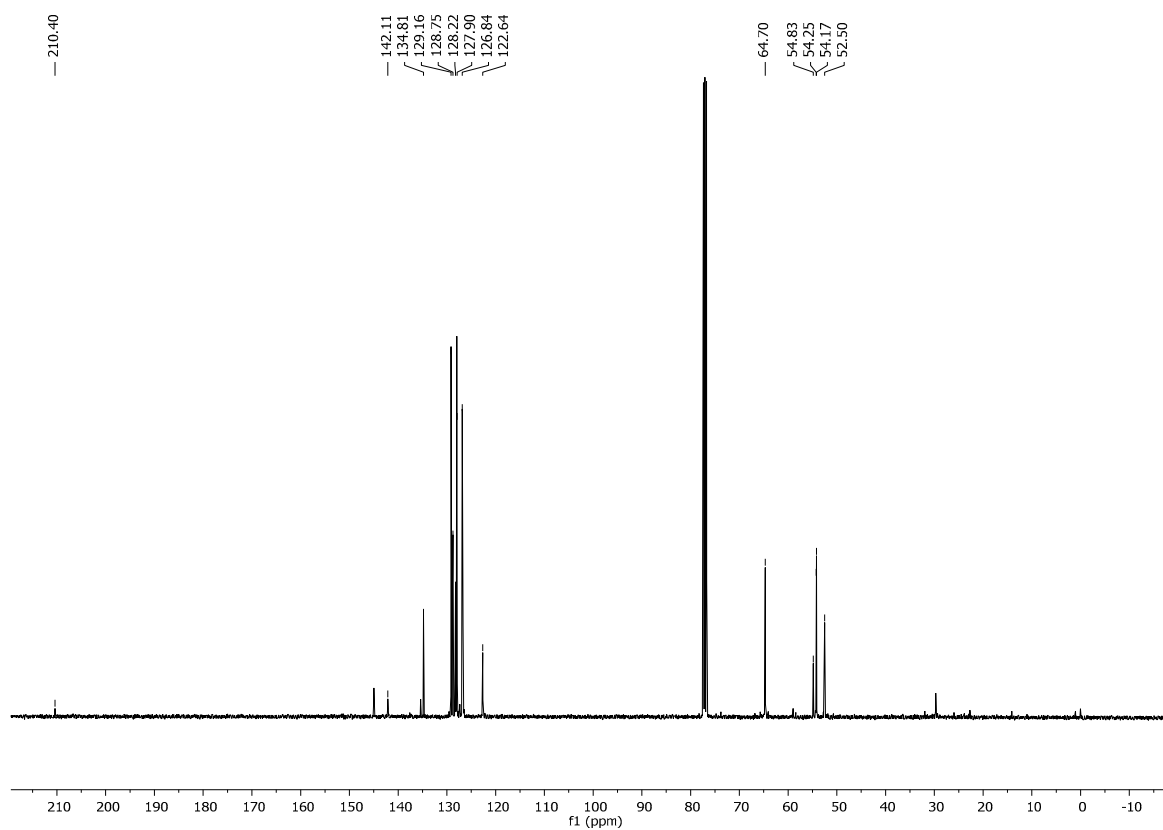

**Figure S16.** <sup>1</sup>H and <sup>13</sup>C-NMR spectra of compound **7a**.

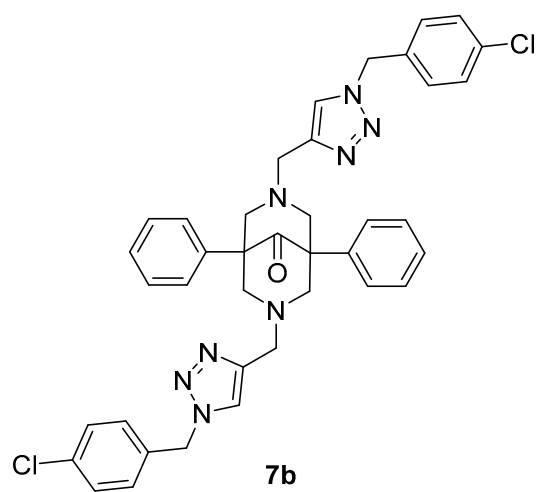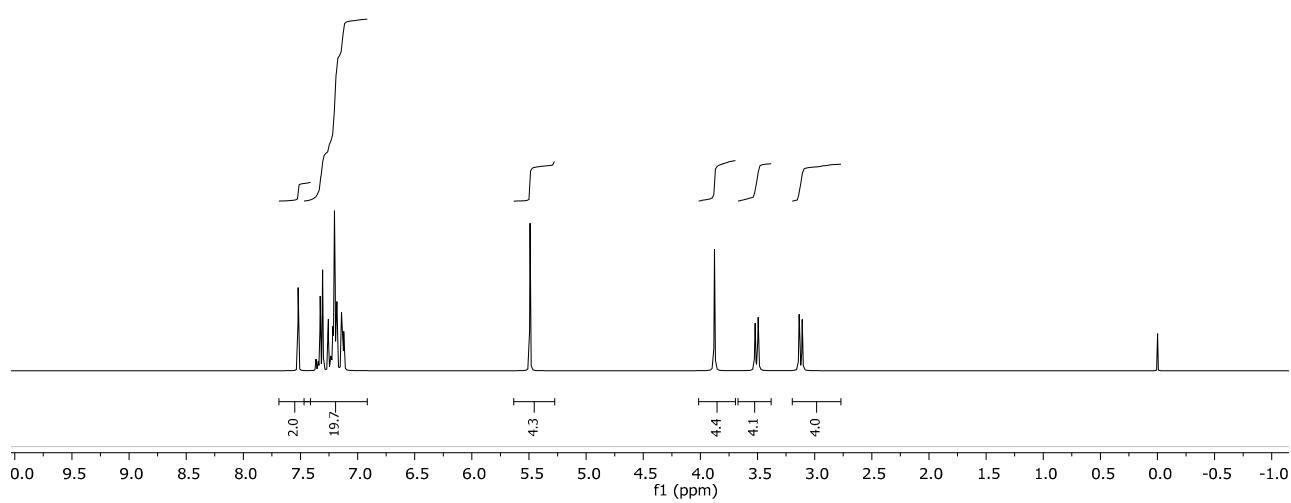

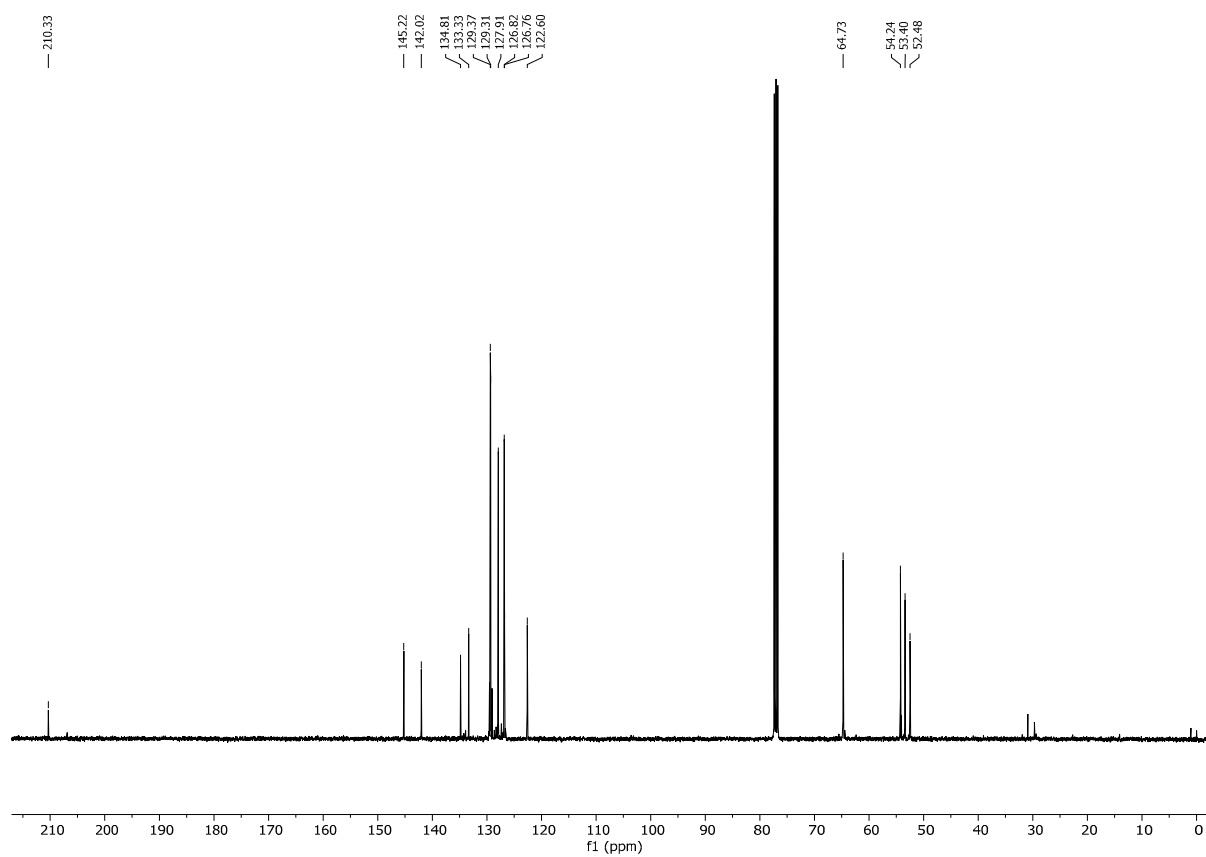

**Figure S17.**  $^1\text{H}$  and  $^{13}\text{C}$ -NMR spectra of compound **7b**.



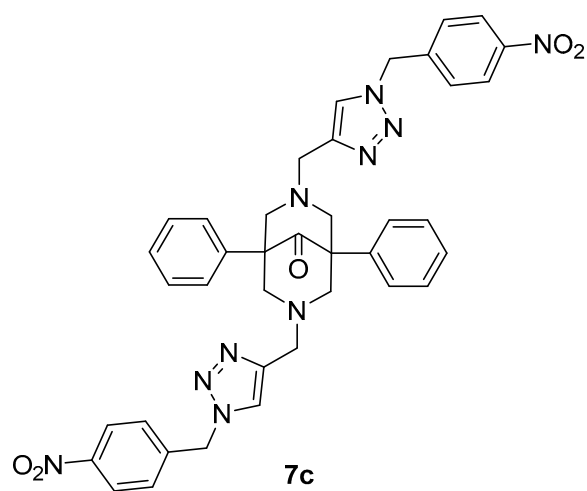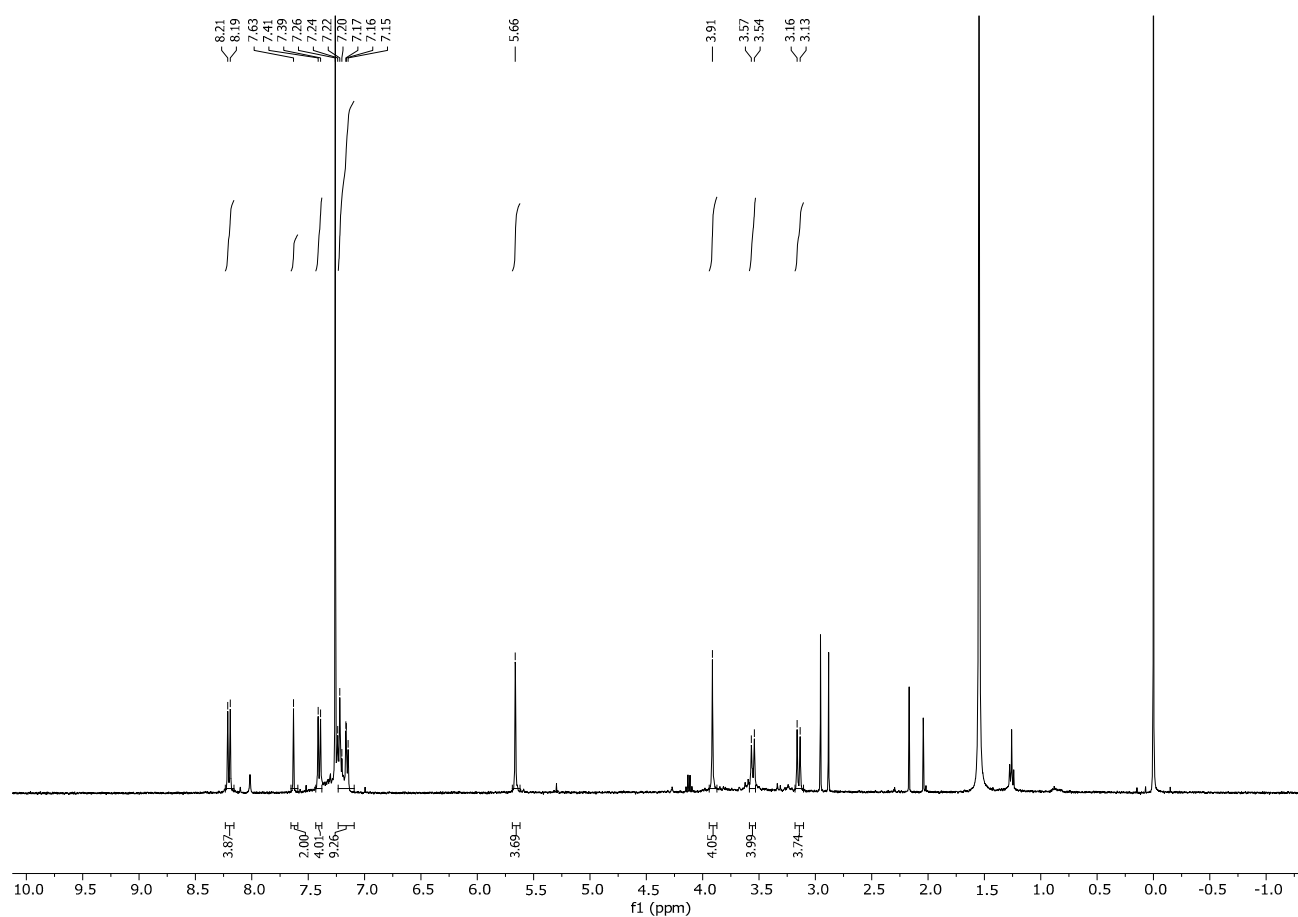

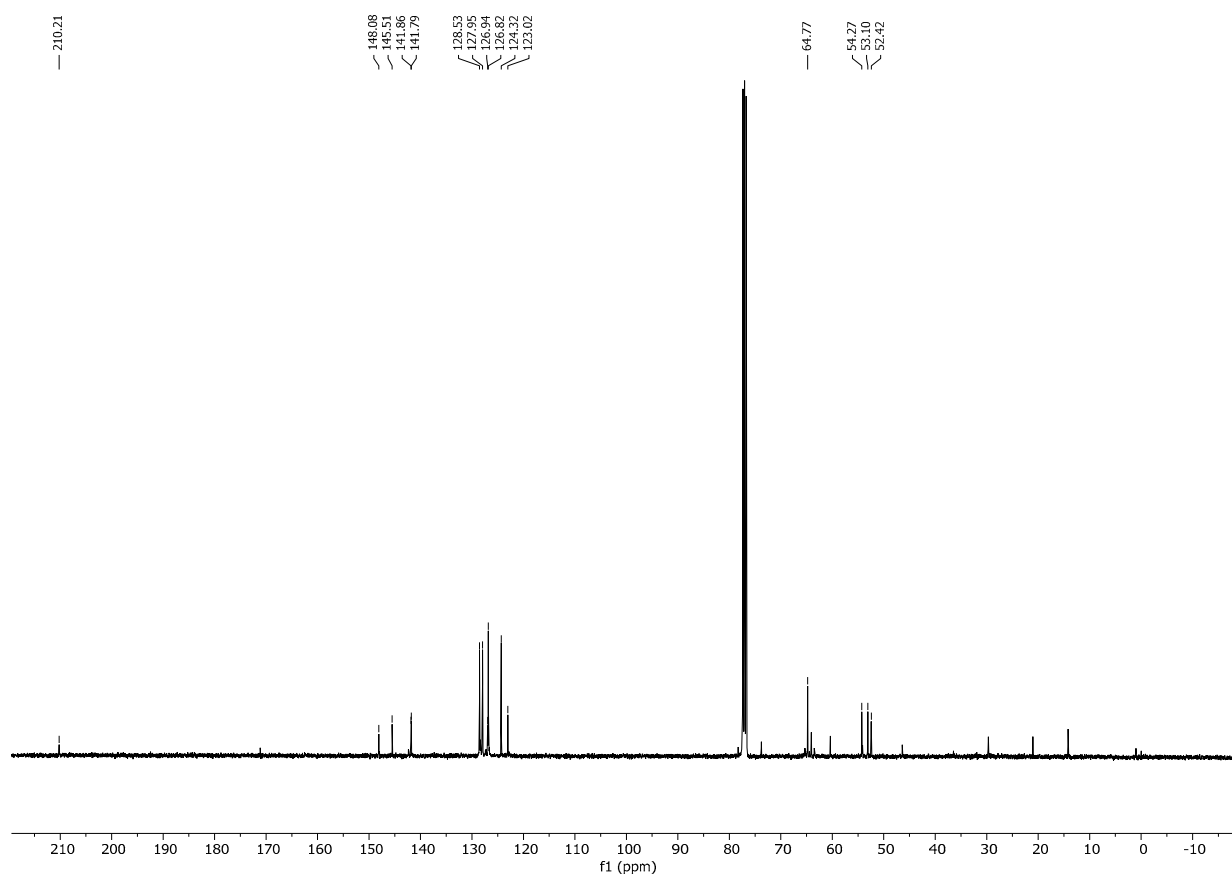

**Figure S18.**  $^1\text{H}$  and  $^{13}\text{C}$ -NMR spectra of compound **7c**.

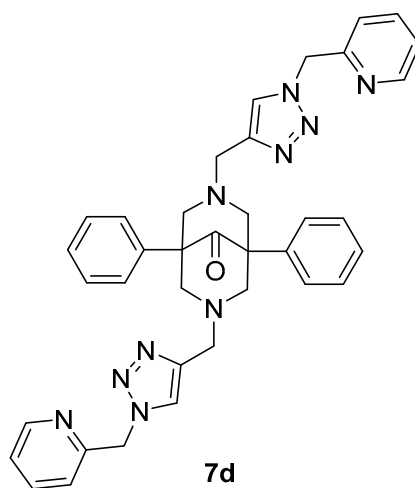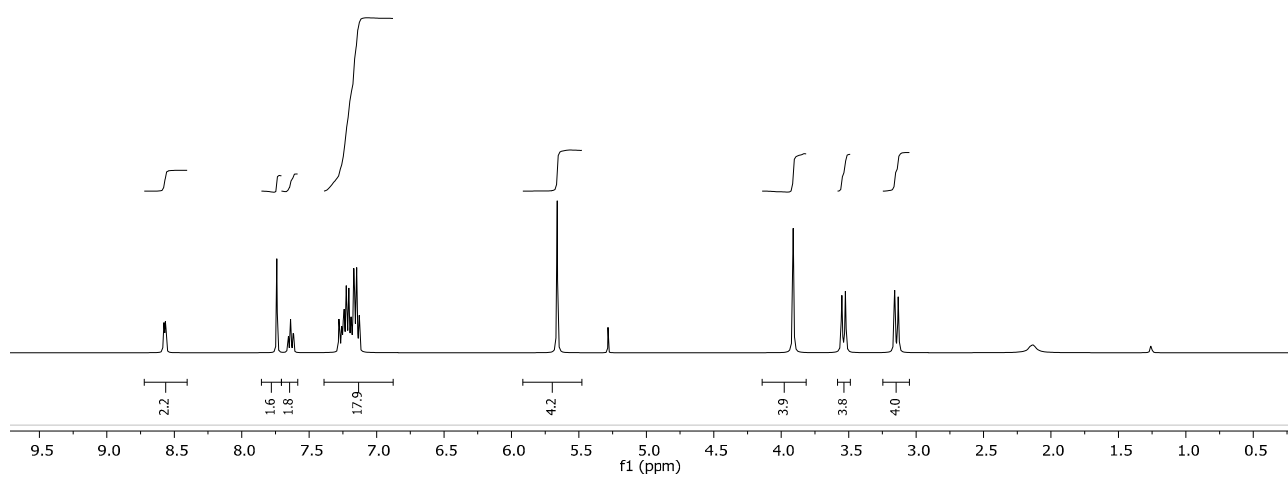

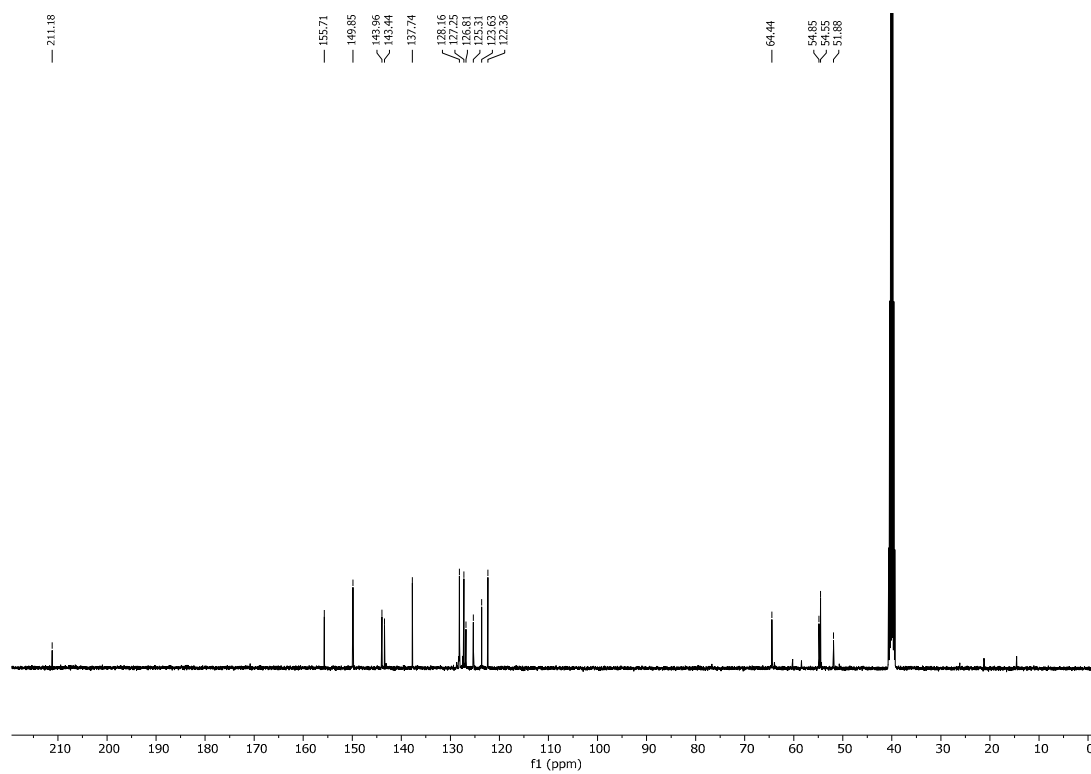

**Figure S19.**  $^1\text{H}$  and  $^{13}\text{C}$ -NMR spectra of compound **7d**.

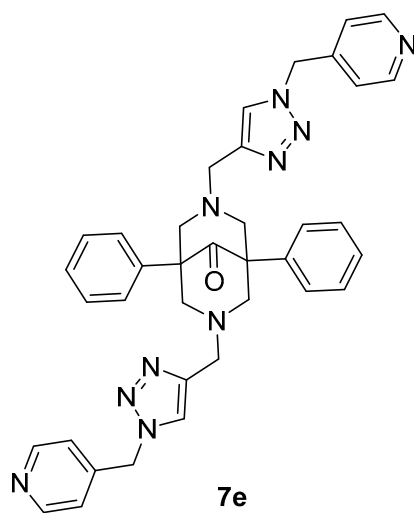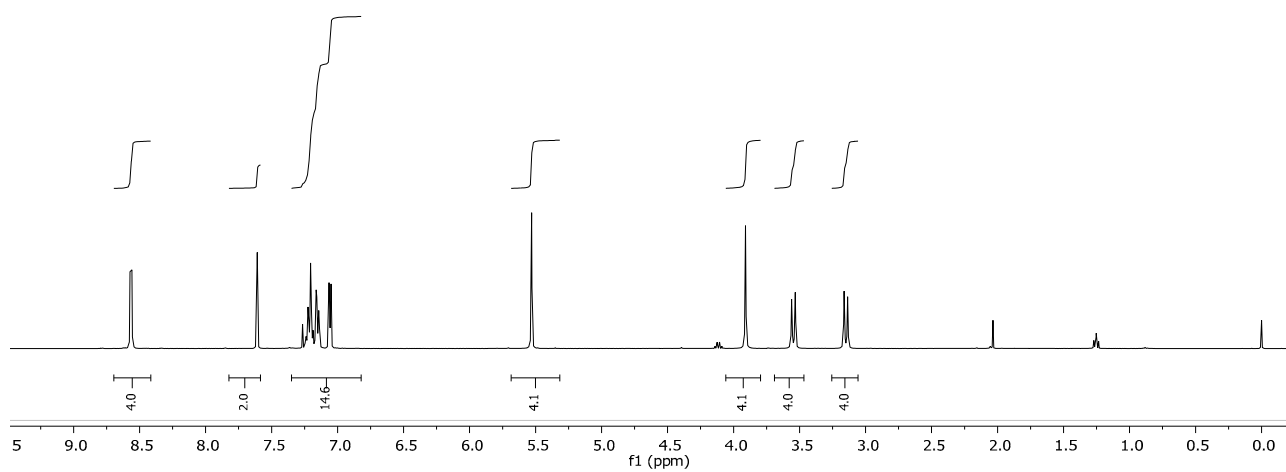

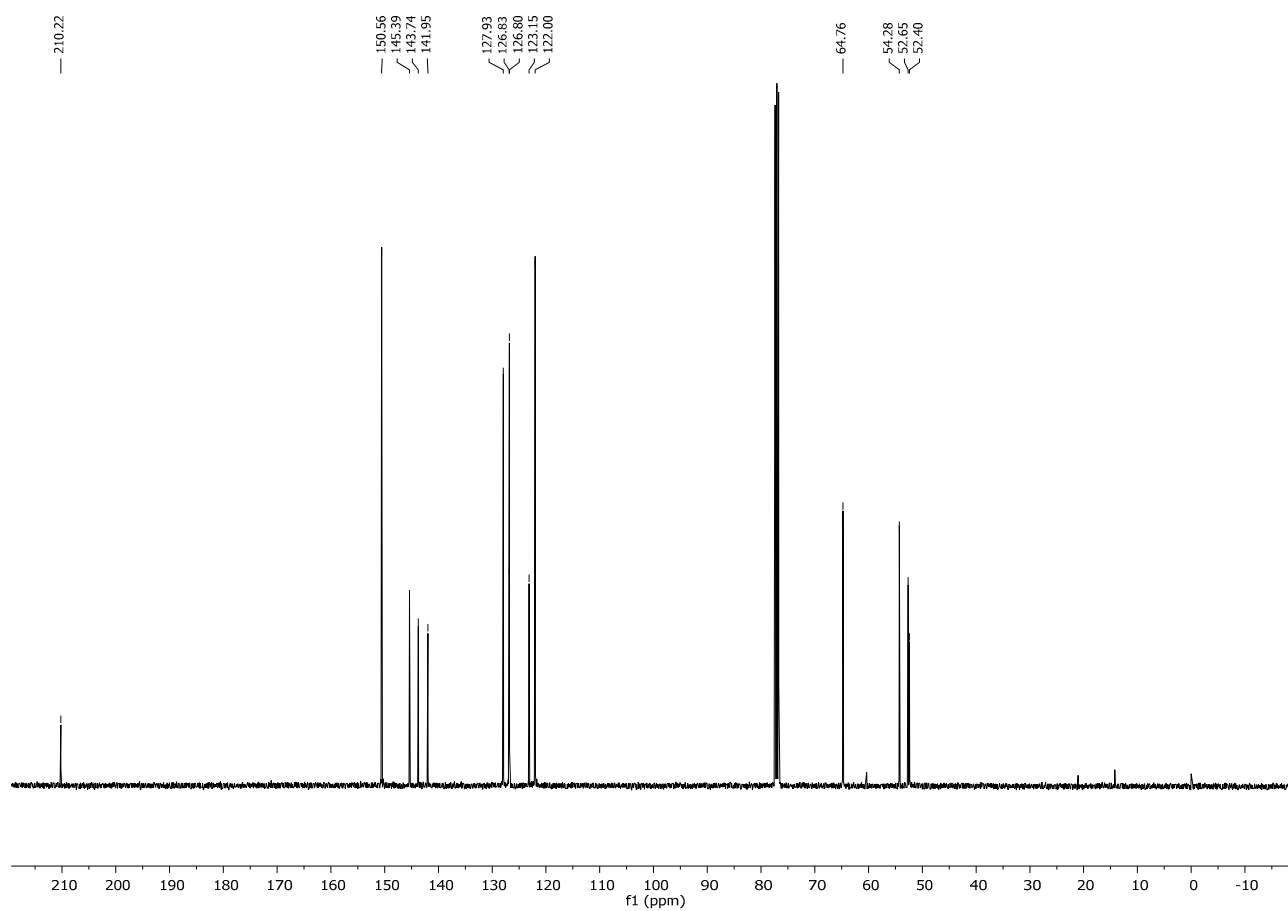

**Figure S20.** <sup>1</sup>H and <sup>13</sup>C-NMR spectra of compound **7e**.

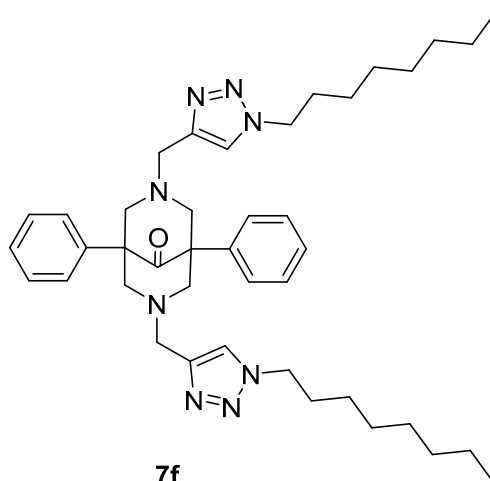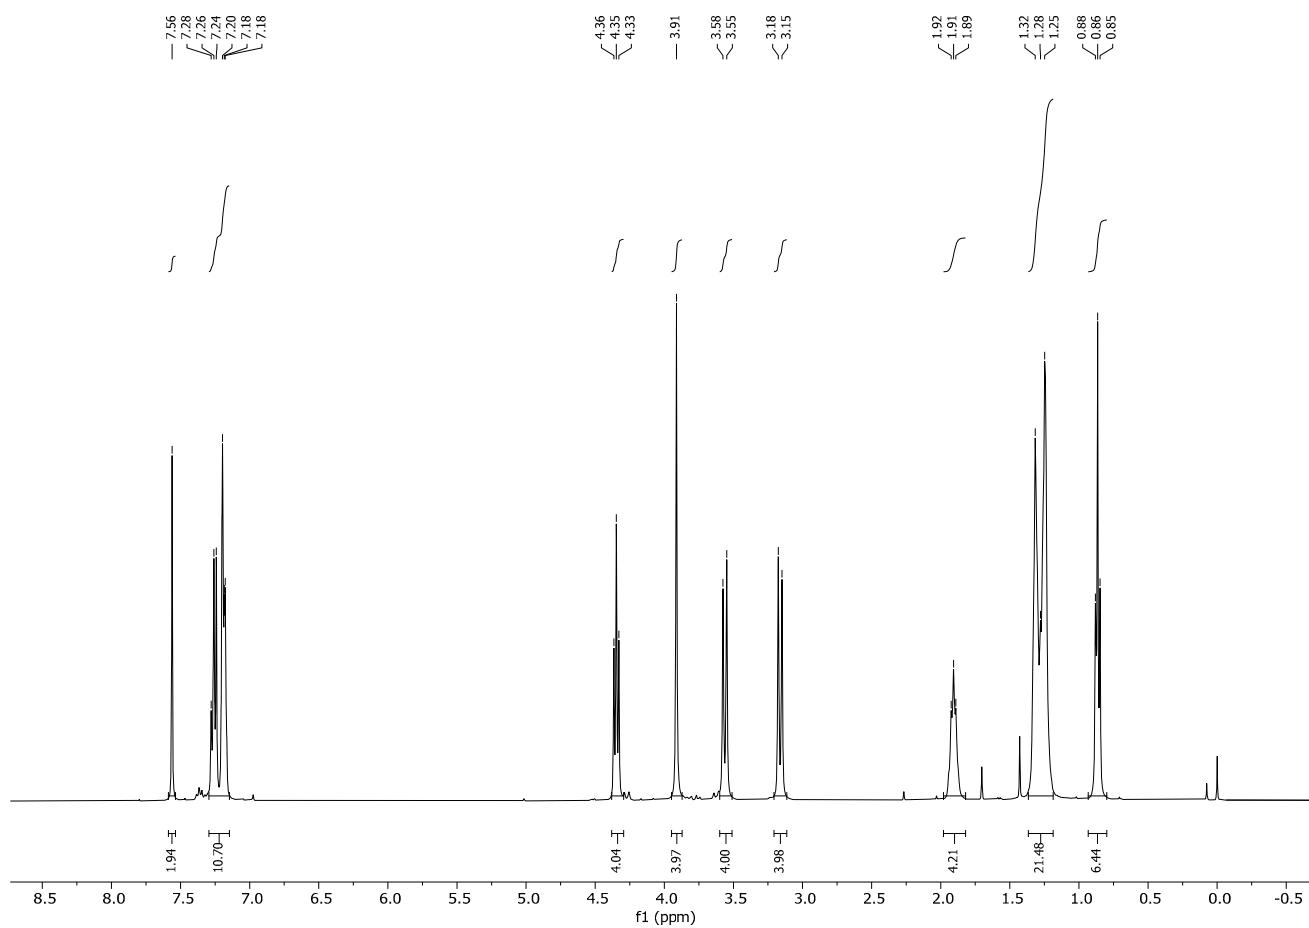

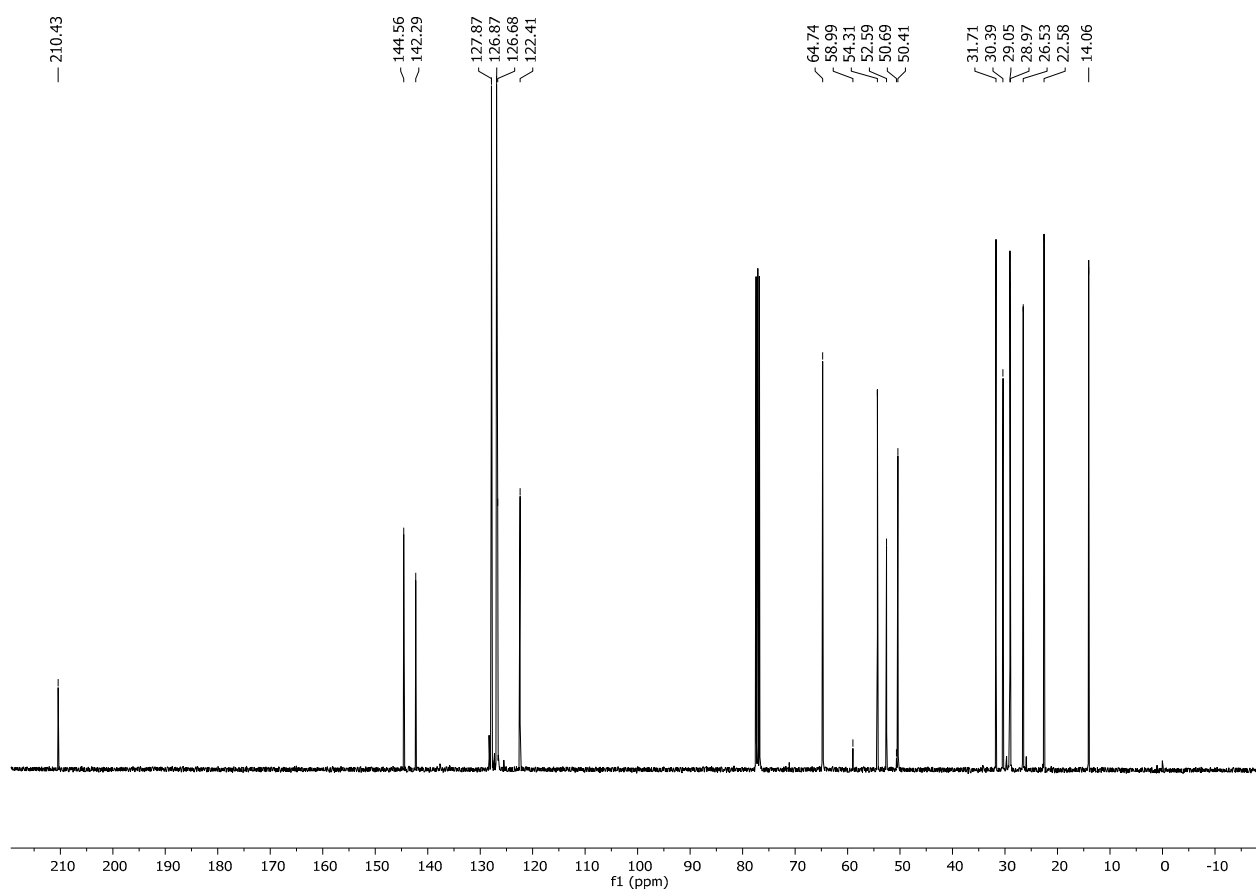

**Figure S21.**  $^1\text{H}$  and  $^{13}\text{C}$ -NMR spectra of compound **7f**.



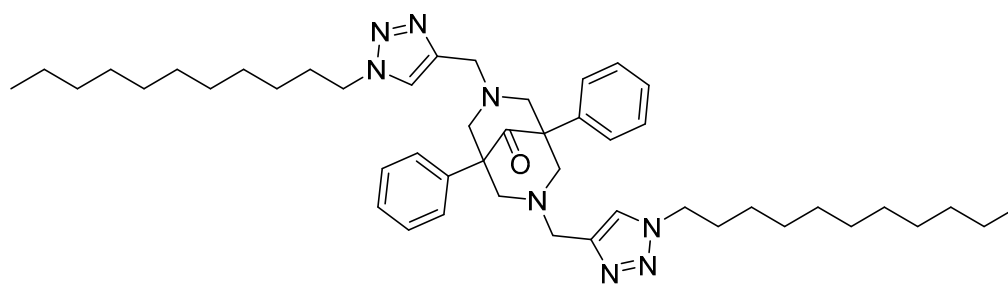

**7g**

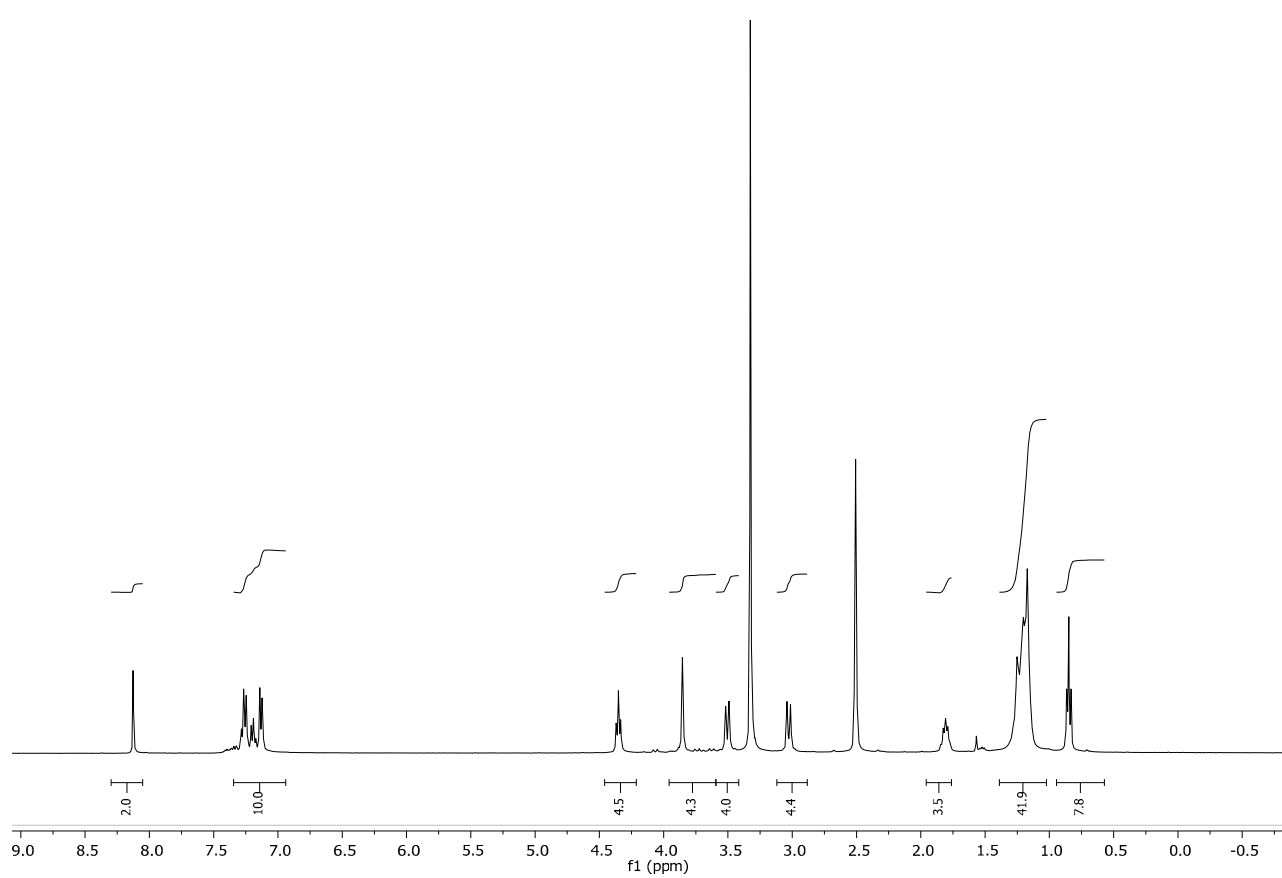

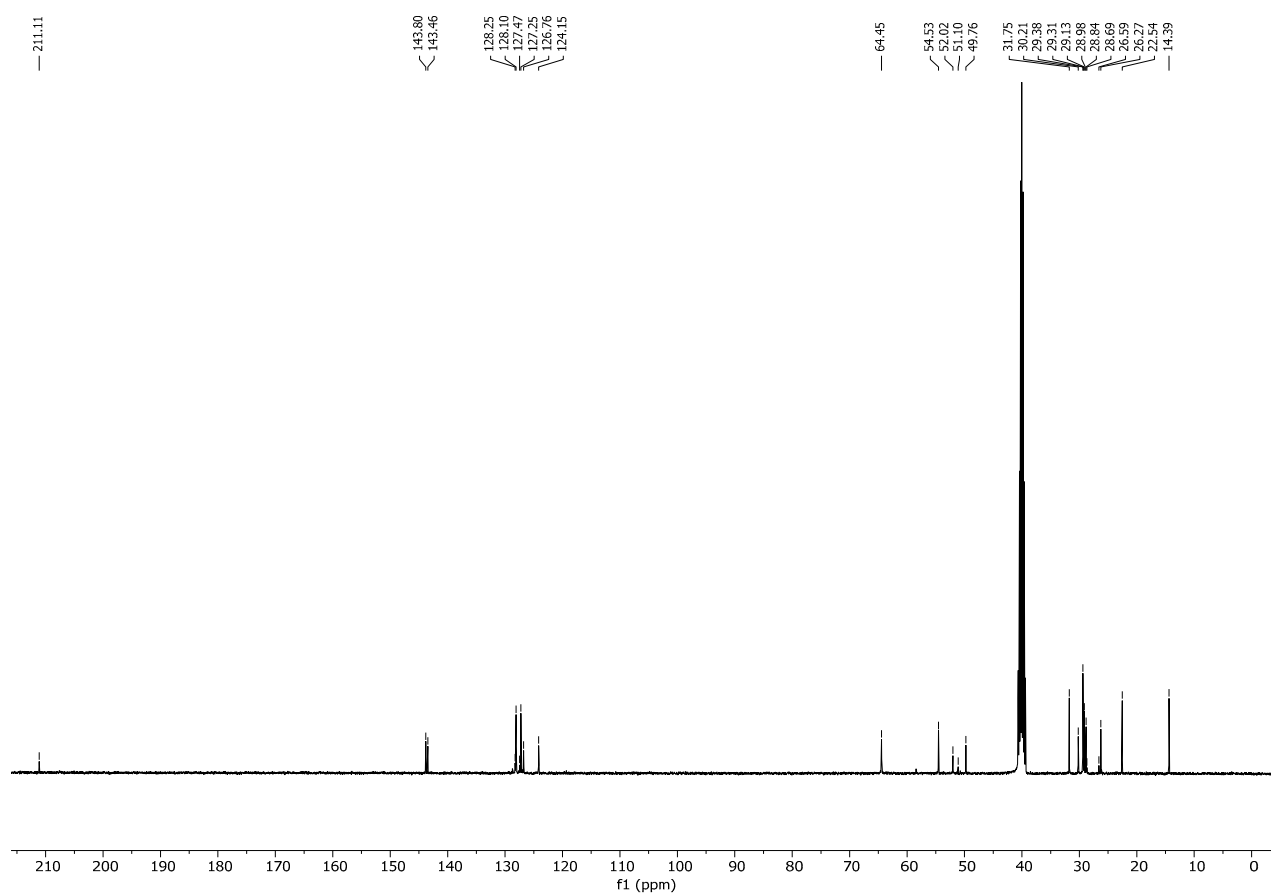

**Figure S22.**  $^1\text{H}$  and  $^{13}\text{C}$ -NMR spectra of compound **7g**.

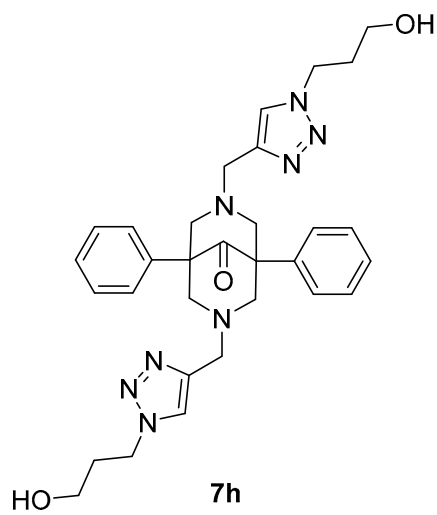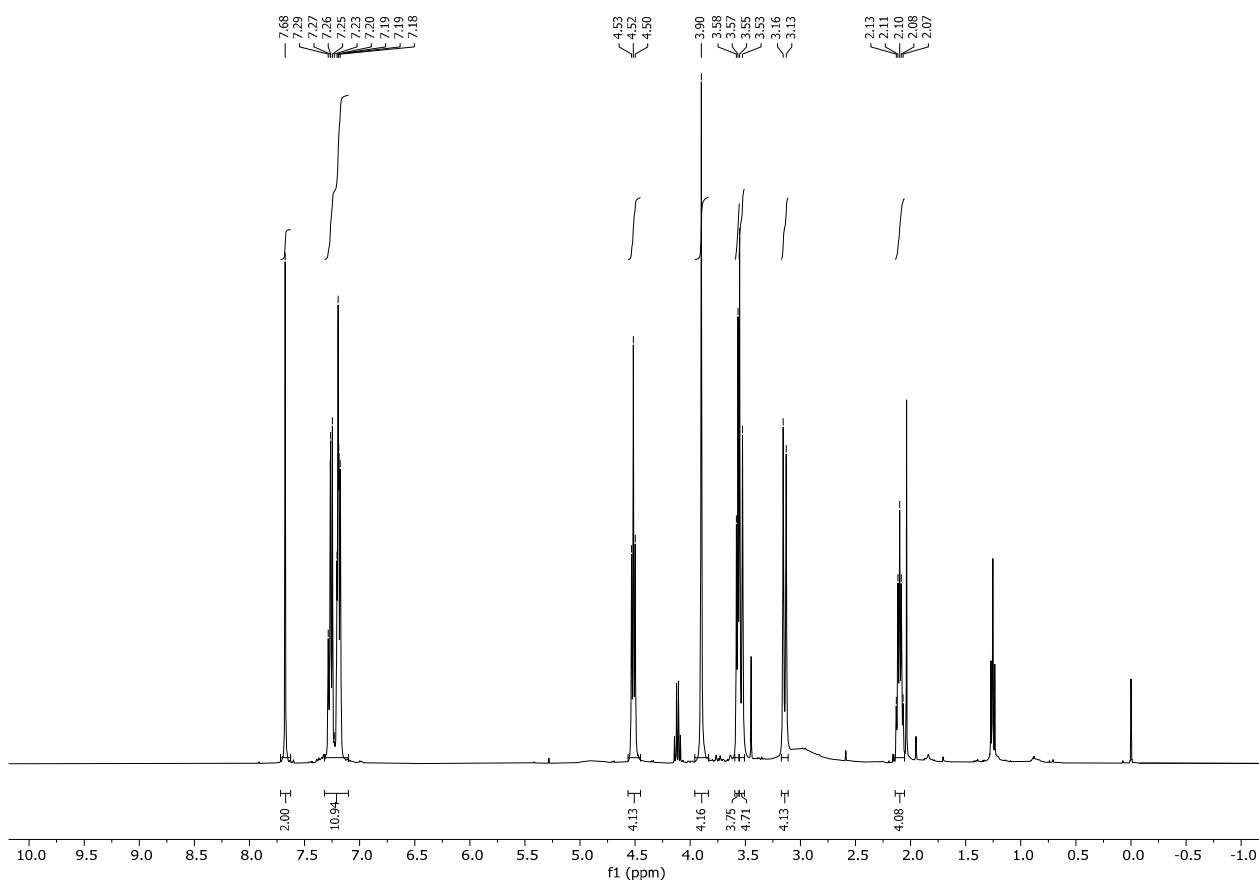

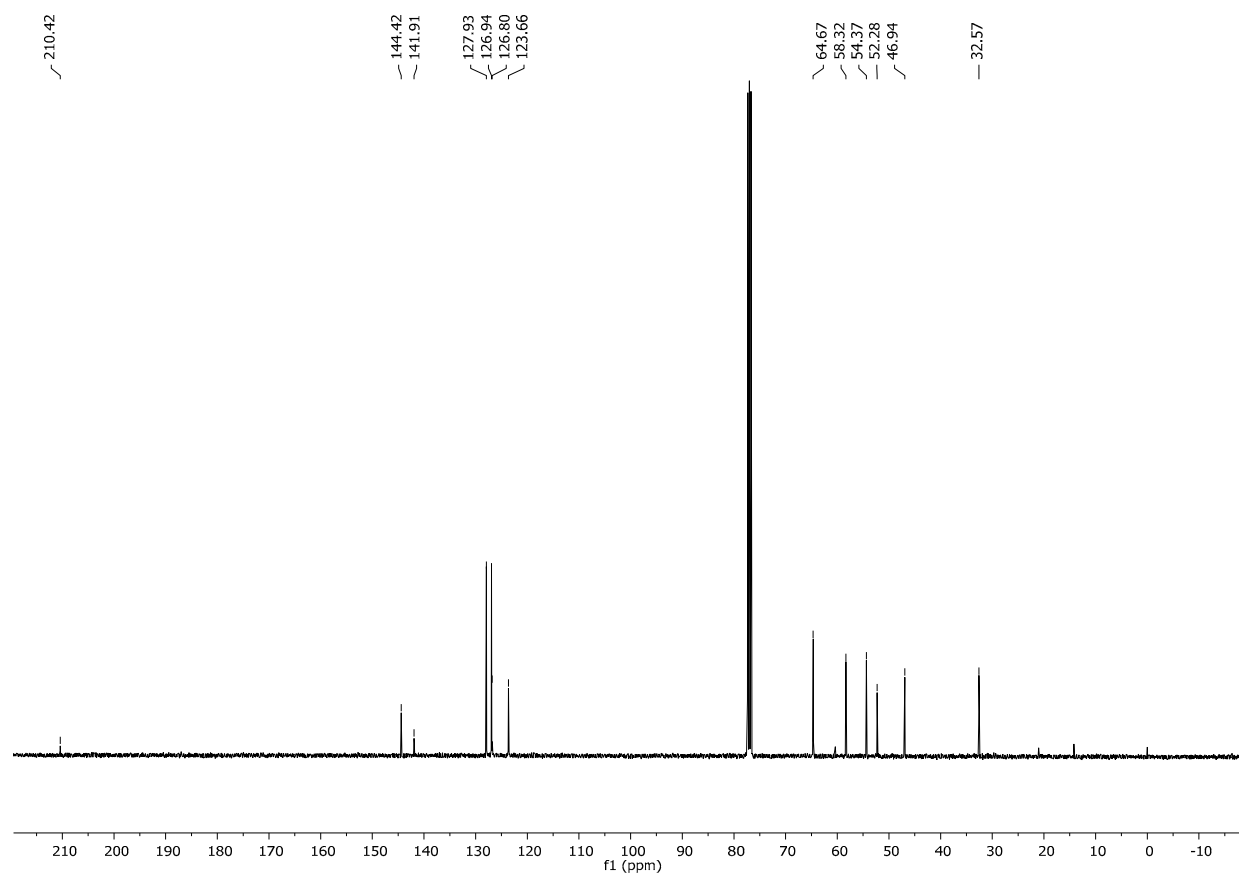

**Figure S23.** <sup>1</sup>H and <sup>13</sup>C-NMR spectra of compound 7h.

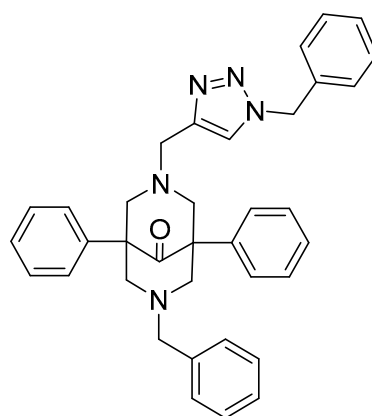

**8a**

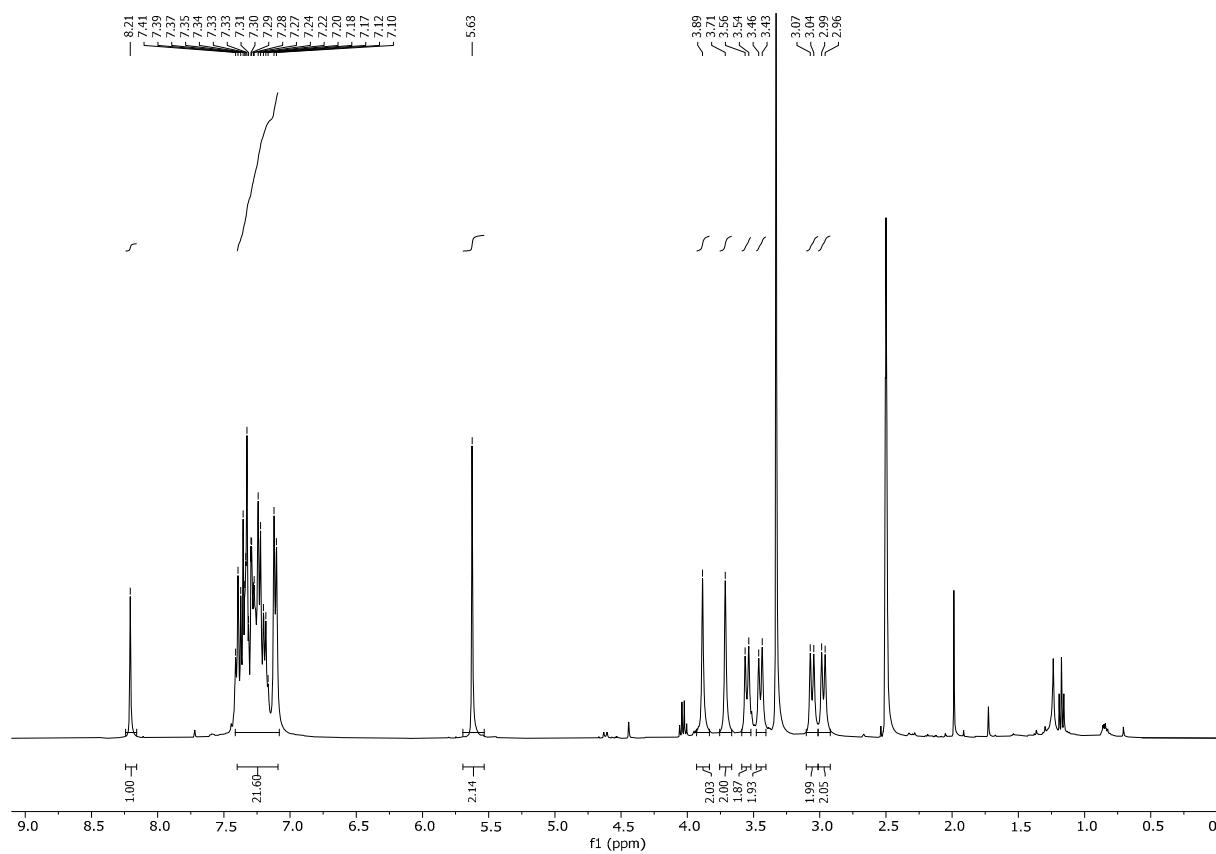

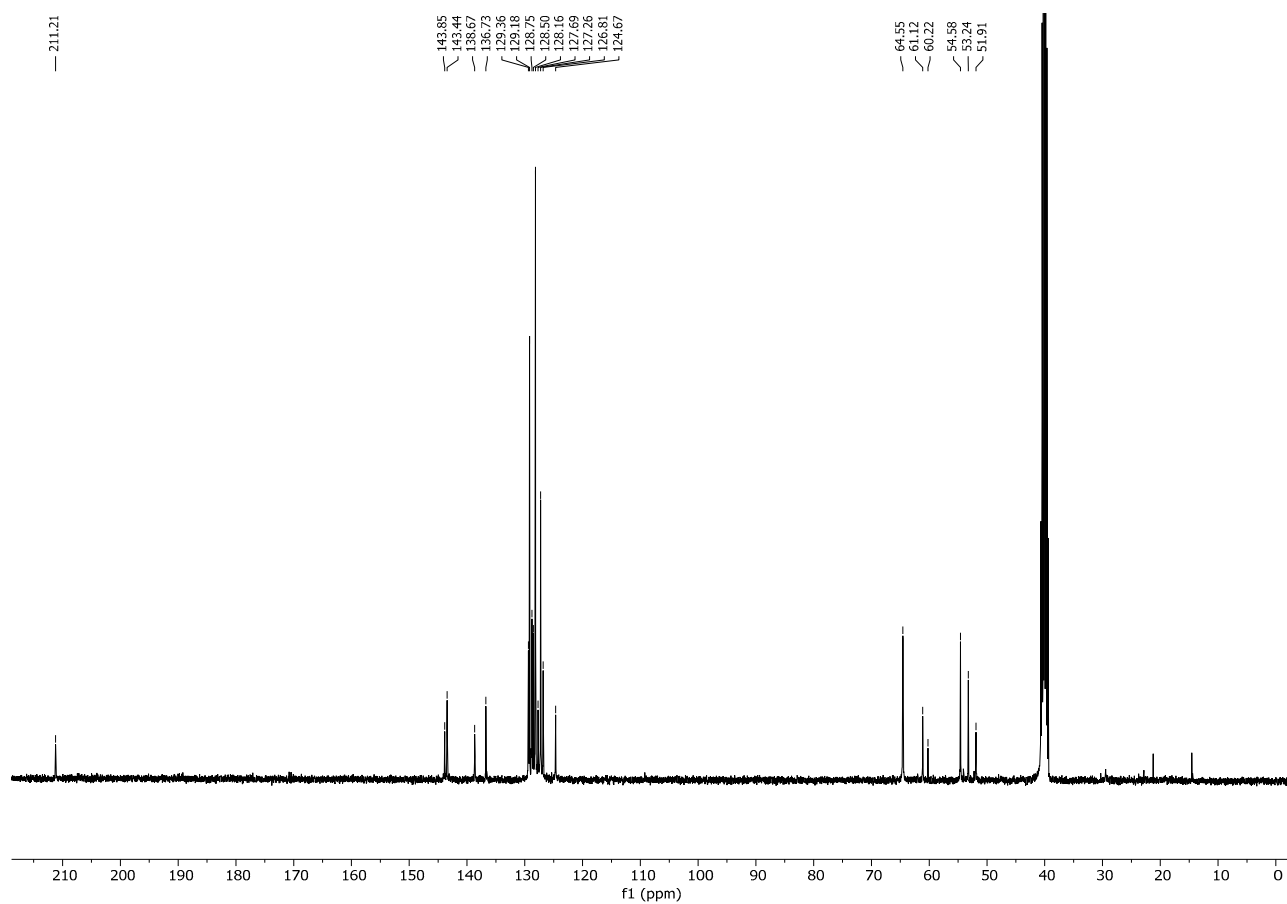

Figure S24.  $^1\text{H}$  and  $^{13}\text{C}$ -NMR spectra of compound 8a.

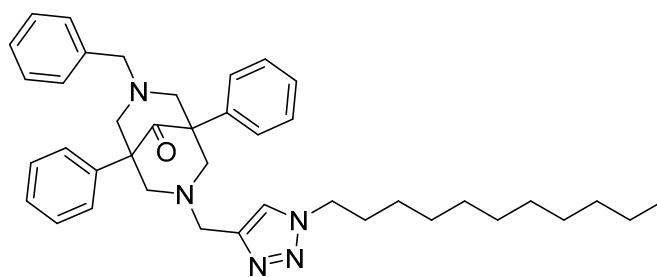

**8b**

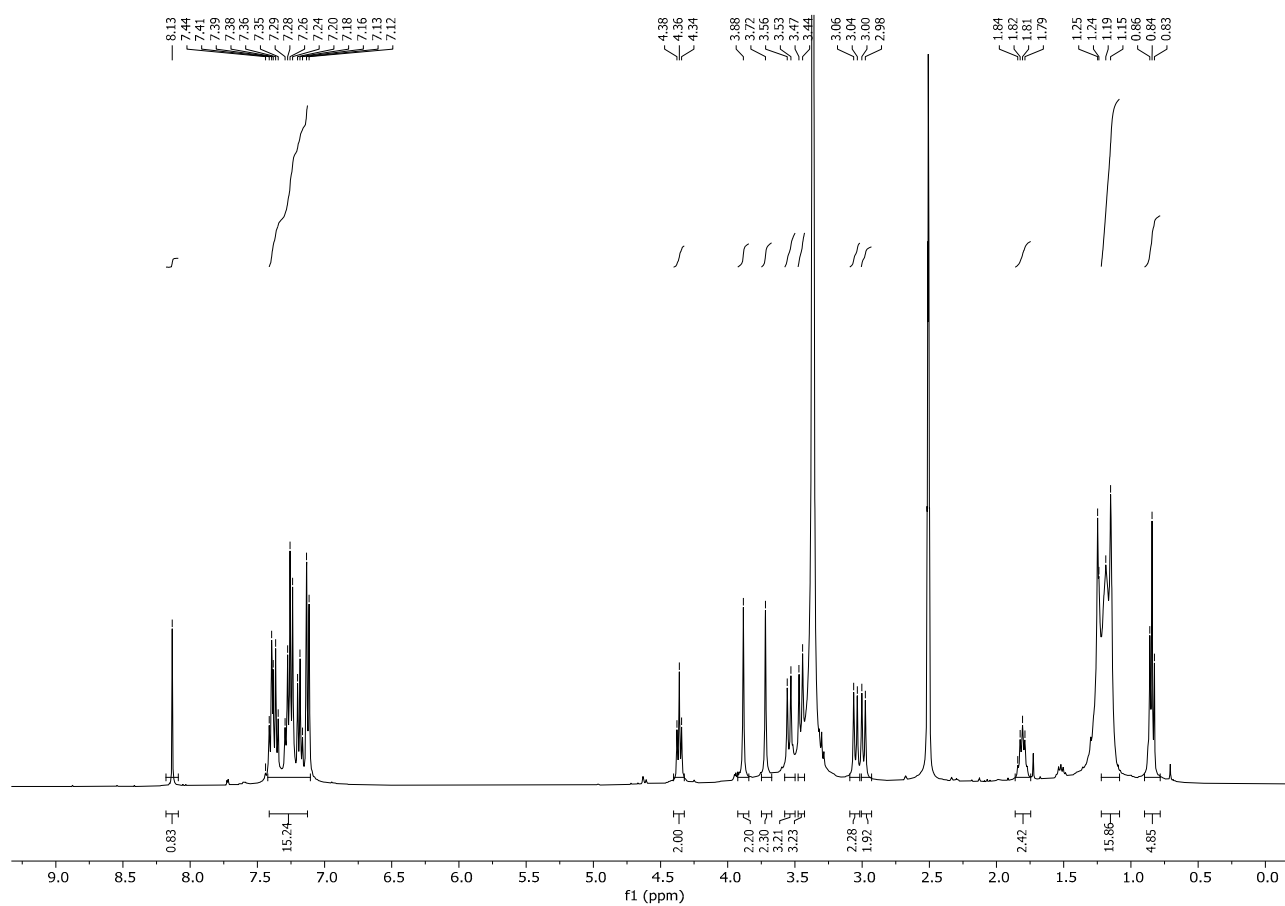

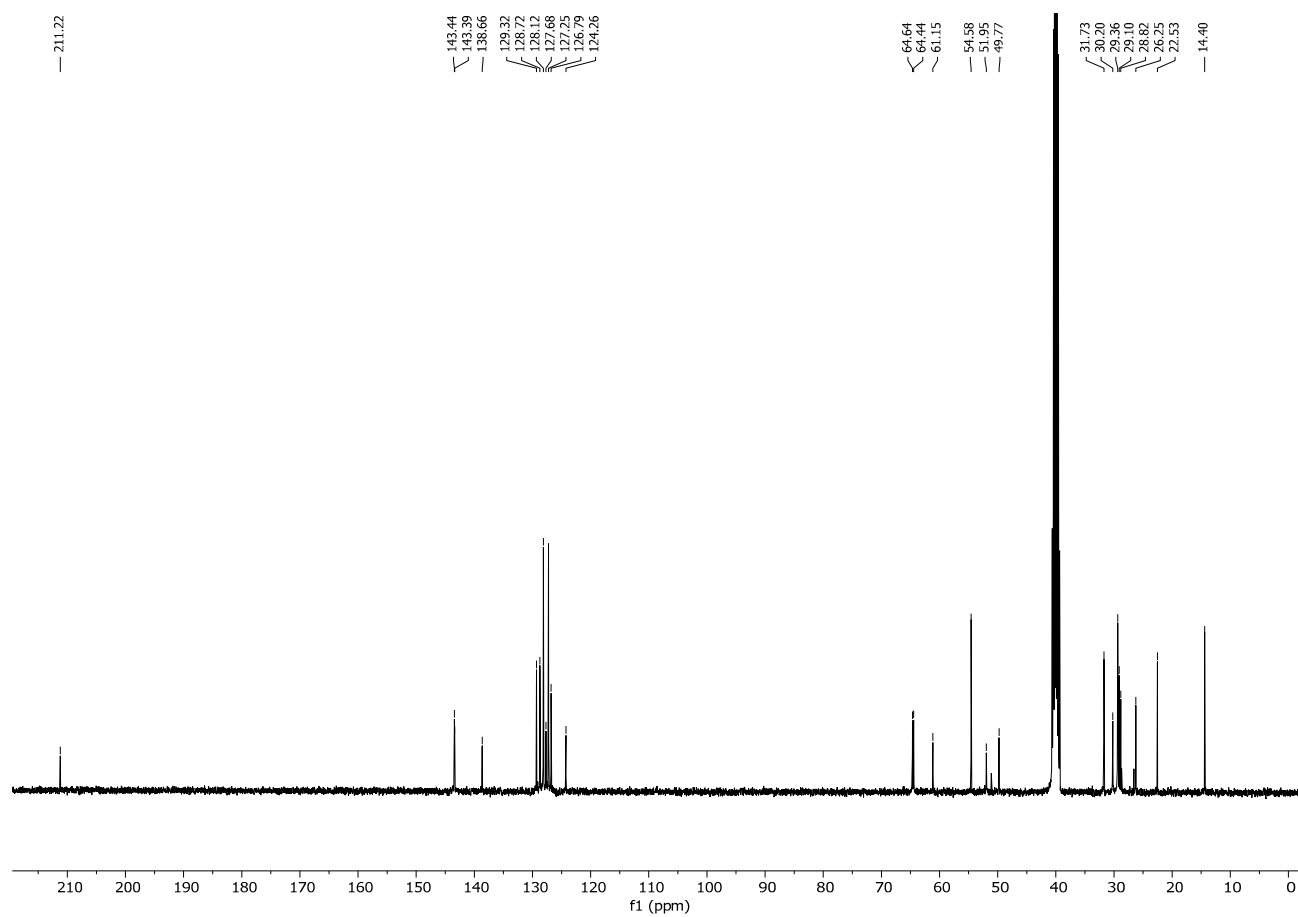

**Figure S25.**  $^1\text{H}$  and  $^{13}\text{C}$ -NMR spectra of compound **8b**.



## 2. NMR TITRATION OF BISPIDINE-METAL COMPLEXES

**Table S1.** Comparison of the free ligands **7a,b,d,h** and their metal complexes: list of the  $\Delta\delta$  in the  $^1\text{H}$ -NMR spectra.

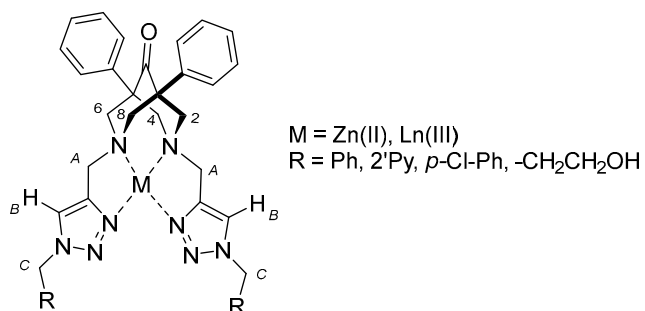

| Entry | Compound           | $\Delta\delta$ for H <sub>2,4,6,8</sub> eq<br>(ppm) | $\Delta\delta$ for H <sub>2,4,6,8</sub> ax<br>(ppm) | $\Delta\delta$ for H <sub>A</sub><br>(ppm) | $\Delta\delta$ for H <sub>B</sub><br>(ppm) | $\Delta\delta$ for H <sub>C</sub><br>(ppm) |
|-------|--------------------|-----------------------------------------------------|-----------------------------------------------------|--------------------------------------------|--------------------------------------------|--------------------------------------------|
| 1     | <b>7b</b> ·Zn(II)  | 0.46                                                | 0.44                                                | 0.18                                       | 0.50                                       | 0.15                                       |
| 2     | <b>7d</b> ·Zn(II)  | 0.50                                                | 0.61                                                | 0.27                                       | 0.24                                       | 0.15                                       |
| 3     | <b>7d</b> ·La(III) | 0.45                                                | 0.70                                                | 0.43                                       | 0.23                                       | 0.03                                       |
| 4     | <b>7a</b> ·La(III) | 0.46                                                | 0.71                                                | 0.42                                       | 0.24                                       | 0.04                                       |
| 5     | <b>7h</b> ·La(III) | 0.45                                                | 0.70                                                | 0.40                                       | 0.40                                       | 0.05                                       |

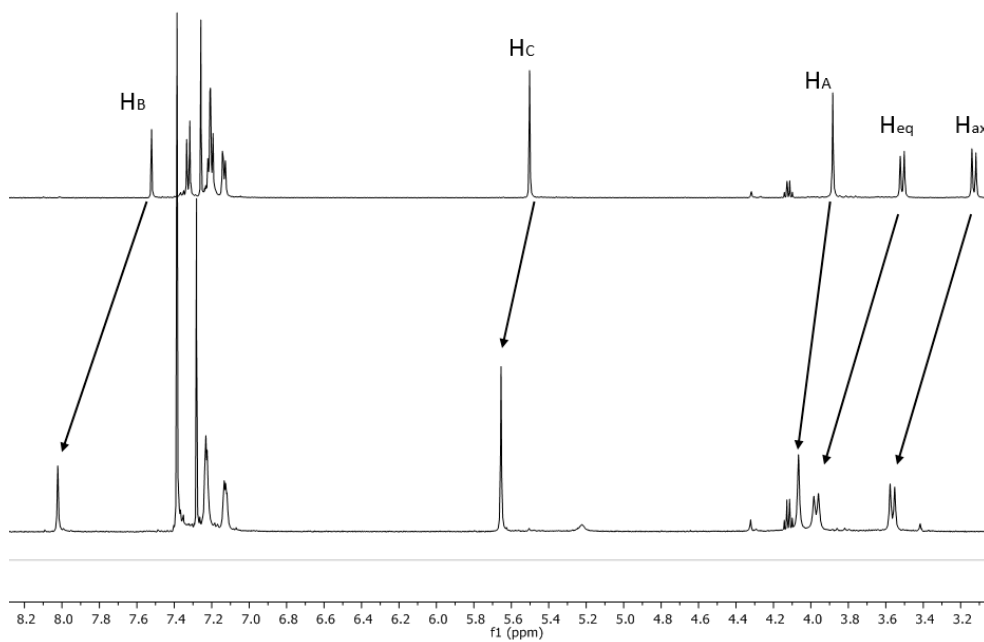

**Figure S26.**  $^1\text{H}$ -NMR spectrum of compound **7b** and its Zn(II)-complex, **7b**·Zn(II).

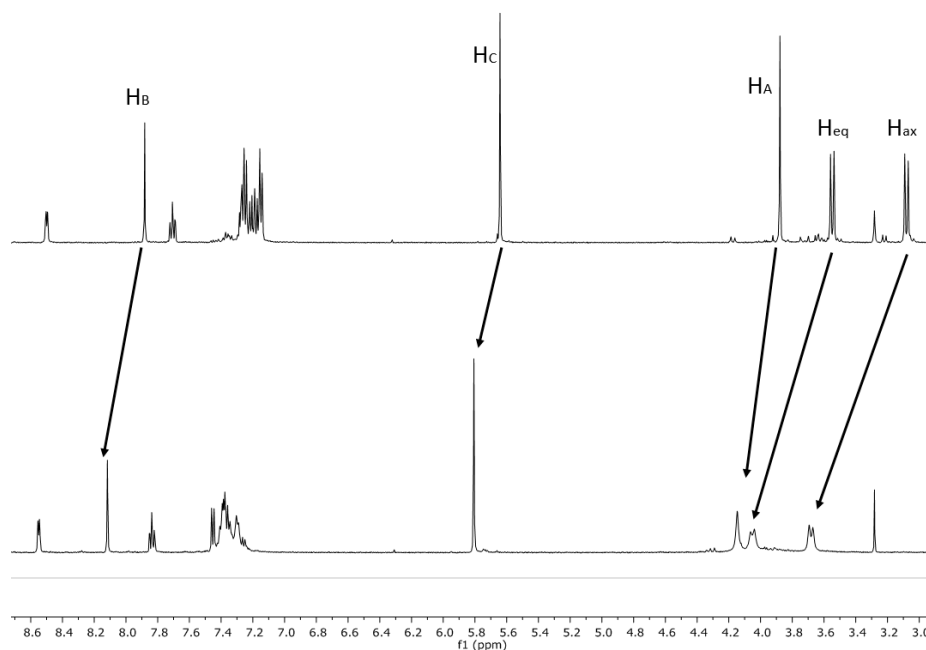

**Figure S27.** <sup>1</sup>H-NMR spectrum of compound **7d** and its Zn(II)-complex **7d-Zn(II)**.

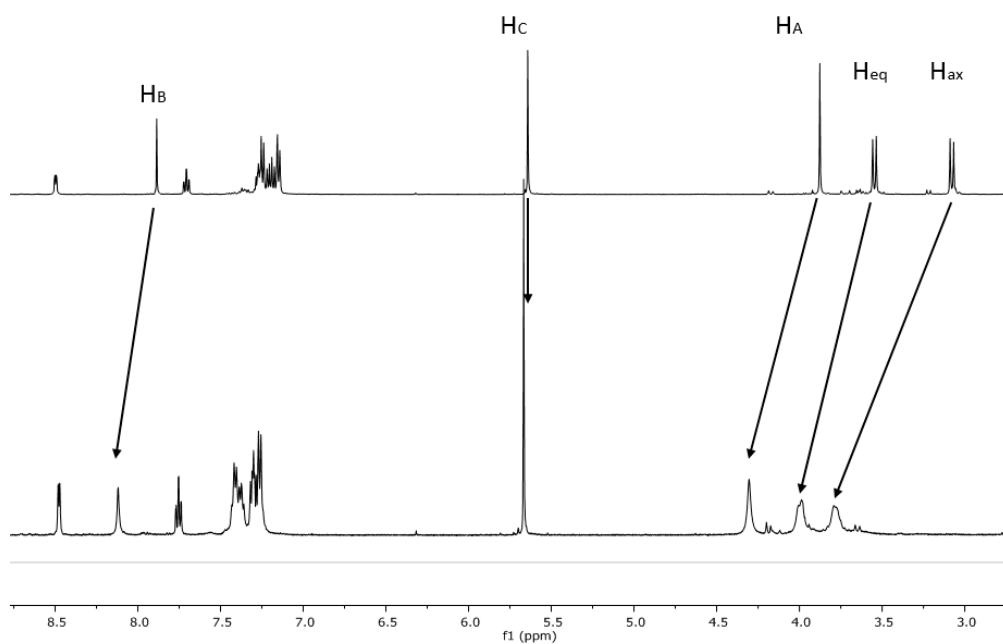

**Figure S28.** <sup>1</sup>H-NMR spectrum of compound **7d** and its La(III)-complex **7d-La(III)**.

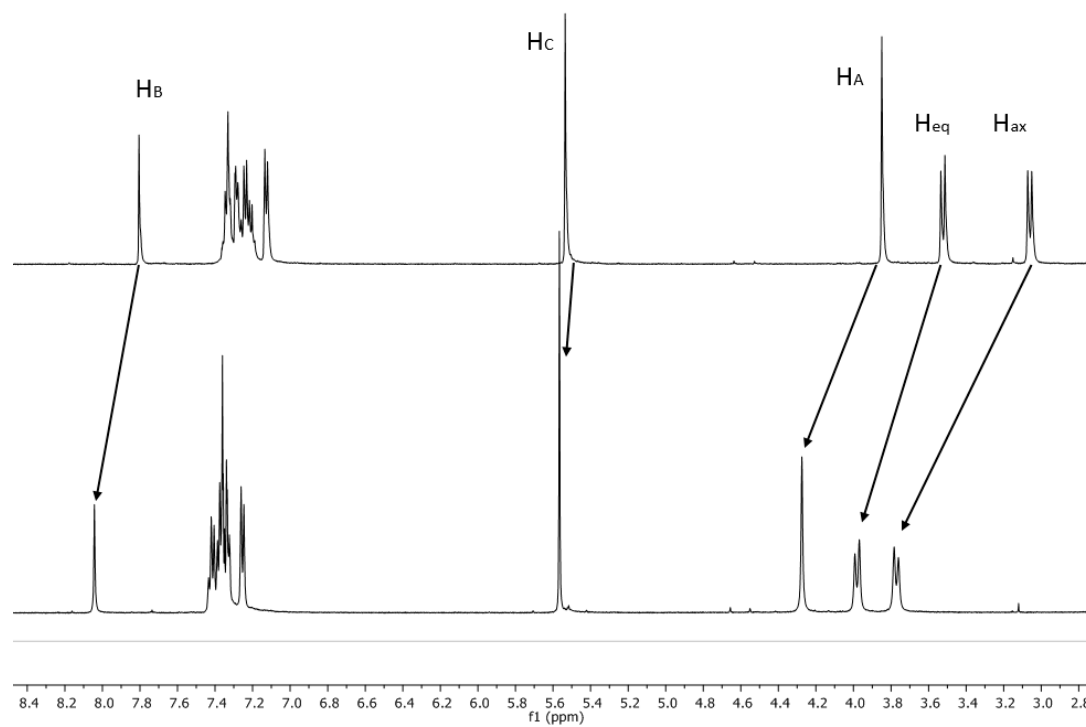

**Figure S29.** <sup>1</sup>H-NMR spectrum of compound **7a** and its La(III) complex **7a·La(III)**.

### 3. ESI-MS ANALYSIS

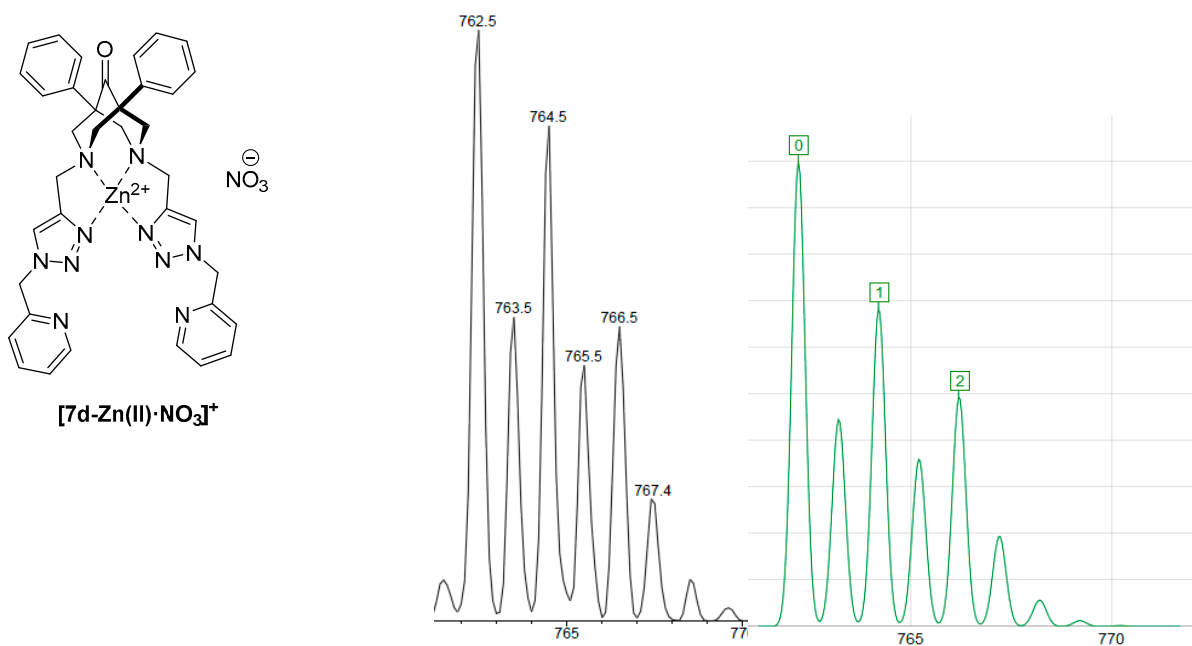

**Figure S30.** Comparison of the experimental ESI-MS spectrum of compound **[7d-Zn(II)·NO<sub>3</sub>]<sup>+</sup>** (left) and the simulation of the isotopic pattern for the elemental composition  $[C_{37}H_{36}N_{11}O_4Zn]^+$  (right).

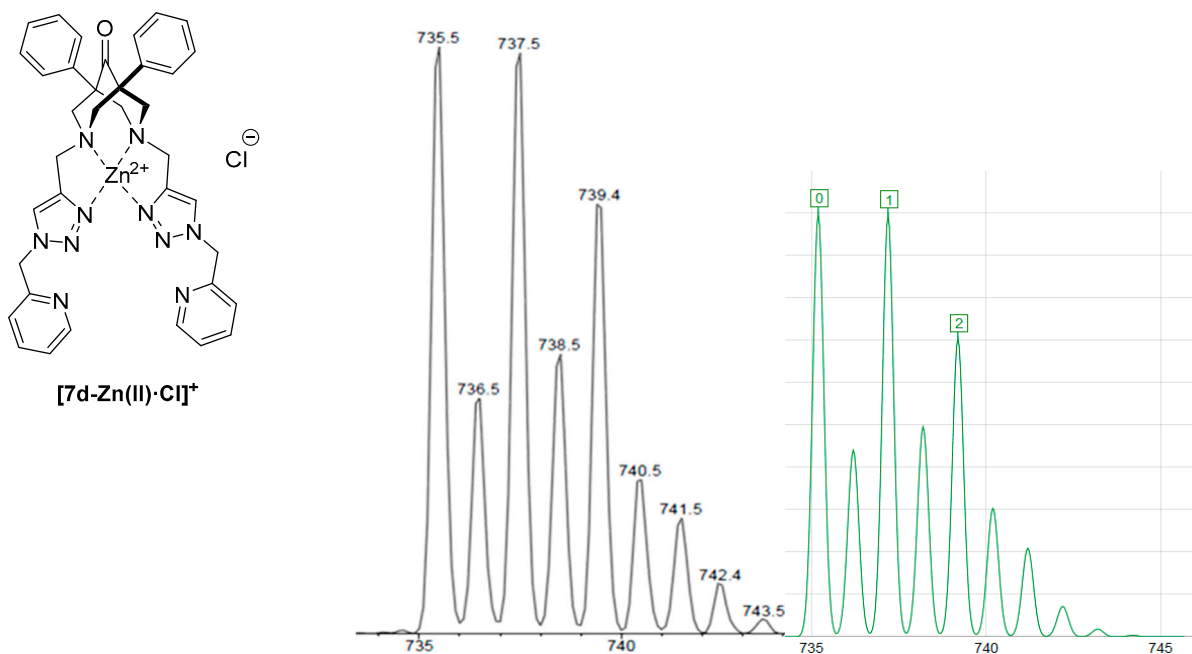

**Figure S31.** Comparison of the experimental ESI-MS spectrum of compound **[7d-Zn(II)·Cl]<sup>+</sup>** (left) and the simulation of the isotopic pattern for the elemental composition  $[C_{37}H_{36}ClN_{10}OZn]^+$  (right).

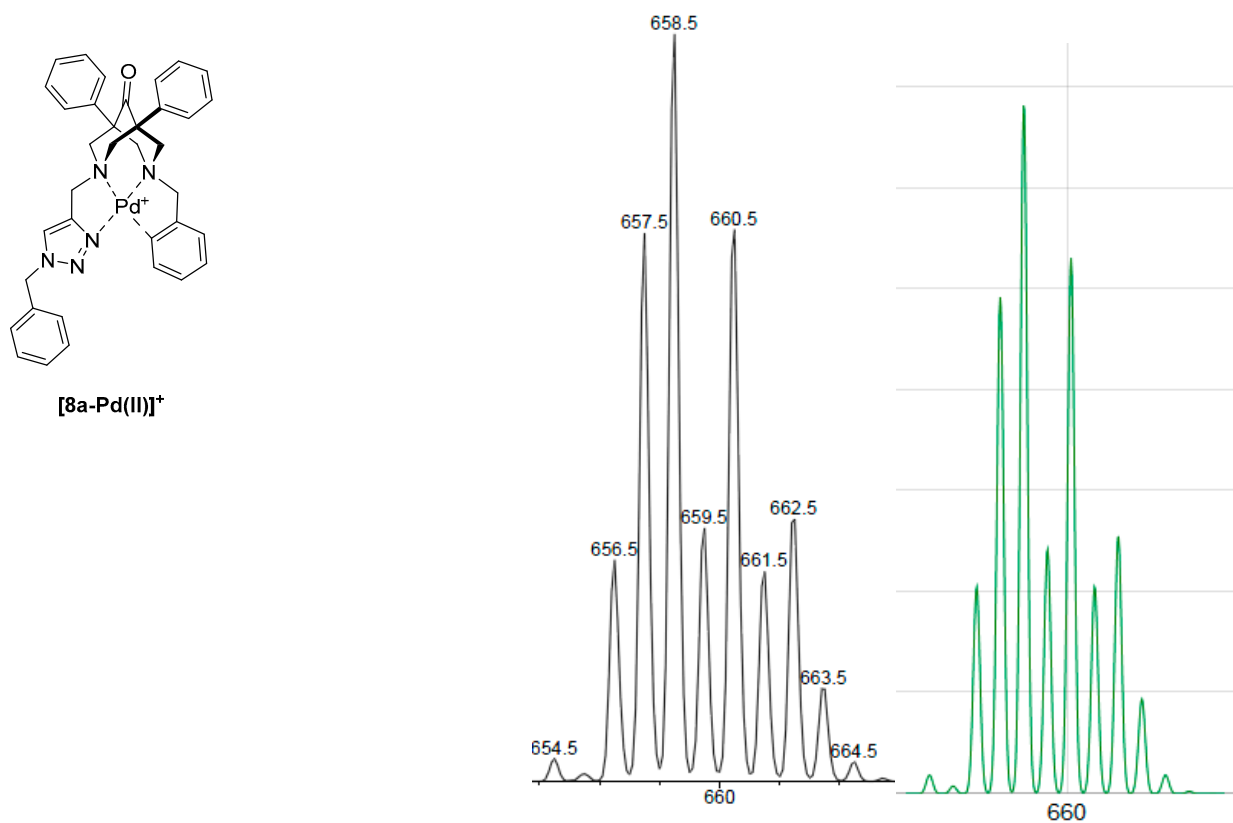

**Figure S32.** Comparison of the experimental ESI-MS spectrum of compound **[8a-Pd(II)]<sup>+</sup>** (left) and the simulation of the isotopic pattern for the elemental composition  $[C_{36}H_{34}N_5OPd]^+$  (right).

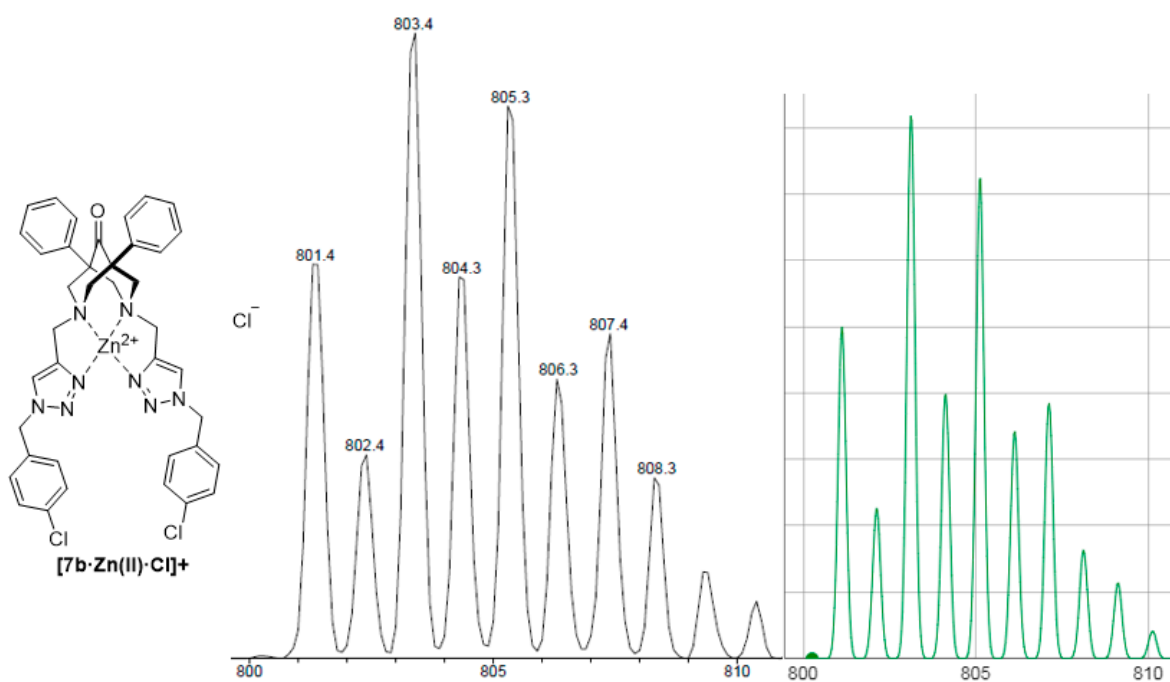

**Figure S33.** Comparison of the experimental ESI-MS spectrum of compound **[7b-Zn(II)·Cl]<sup>+</sup>** (left) and the simulation of the isotopic pattern for the elemental composition  $[C_{39}H_{36}Cl_3N_8OZn]^+$  (right).
